# Supplementary material
Source: PubMed Central journal article supplement (PMC4348065)
Supplement: NIHMS664005-supplement-Supplement.pdf [file NIHMS664005-supplement-Supplement.pdf]

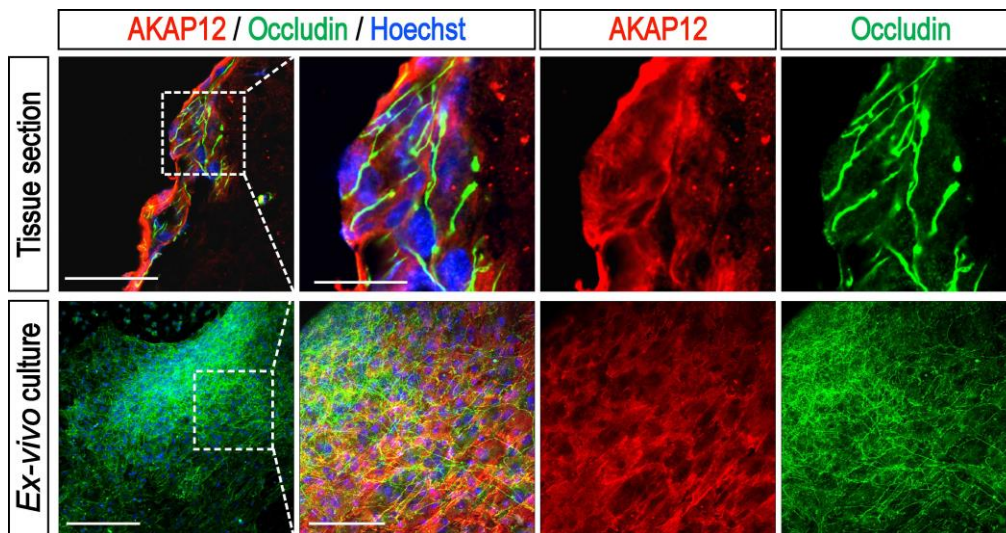

**Supplementary Figure 1. AKAP12-positive meningeal cells highly express occluding** AKAP12 meningeal cells expressed occludin. Brain tissue sections were stained with antibodies against AKAP12 and occludin. Nuclei were counterstained with Hoechst 33342. Scale bar: 50  $\mu\text{m}$  (leftmost panel), 20  $\mu\text{m}$  (magnified panels). The meninges were *ex vivo* cultured for 3 days on cover slips. AKAP12-positive meningeal cells expressed occludin with epithelial morphology. Nuclei were counterstained with Hoechst 33342. Scale bar: 200  $\mu\text{m}$  (leftmost panel), 100  $\mu\text{m}$  (magnified panels). These data represent the results from independent experiments repeated at least five times using different animals or conditions.

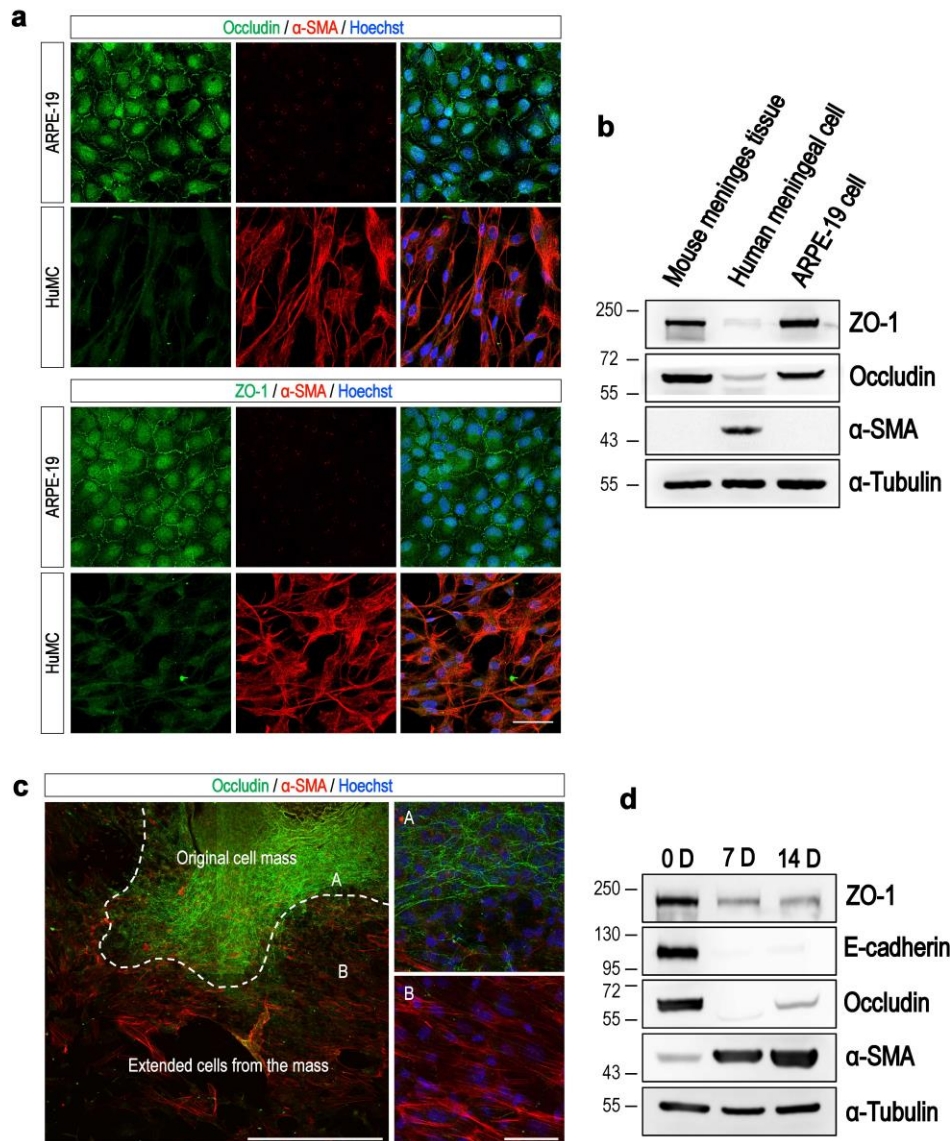

**Supplementary Figure 2. Meningeal cells easily lose epithelial properties under culture condition** (a) ARPE-19 and human meningeal cells on coverslips were fixed and co-immunostained with antibodies against occludin, ZO-1 and  $\alpha$ -SMA. Scale bar: 50  $\mu$ m (b) Protein levels were analyzed through western blotting. Human meningeal cell does not have epithelial properties, compared to mouse meninges tissue and ARPE-19 cell line (c) Meninges *ex vivo* cultured for 3 days on cover slip was co-stained with antibodies against occludin and  $\alpha$ -SMA. Scale bar: 500um (largest panels), 50um (panel A, B) (d) Meninges *ex vivo* cultured for 0, 7, and 14 days were lysed and proteins were extracted. Lysates were analyzed by immunoblotting. Meninges easily lost epithelial properties and were converted to mesenchymal state. Each panel represents the results from independent experiments repeated at least four times.

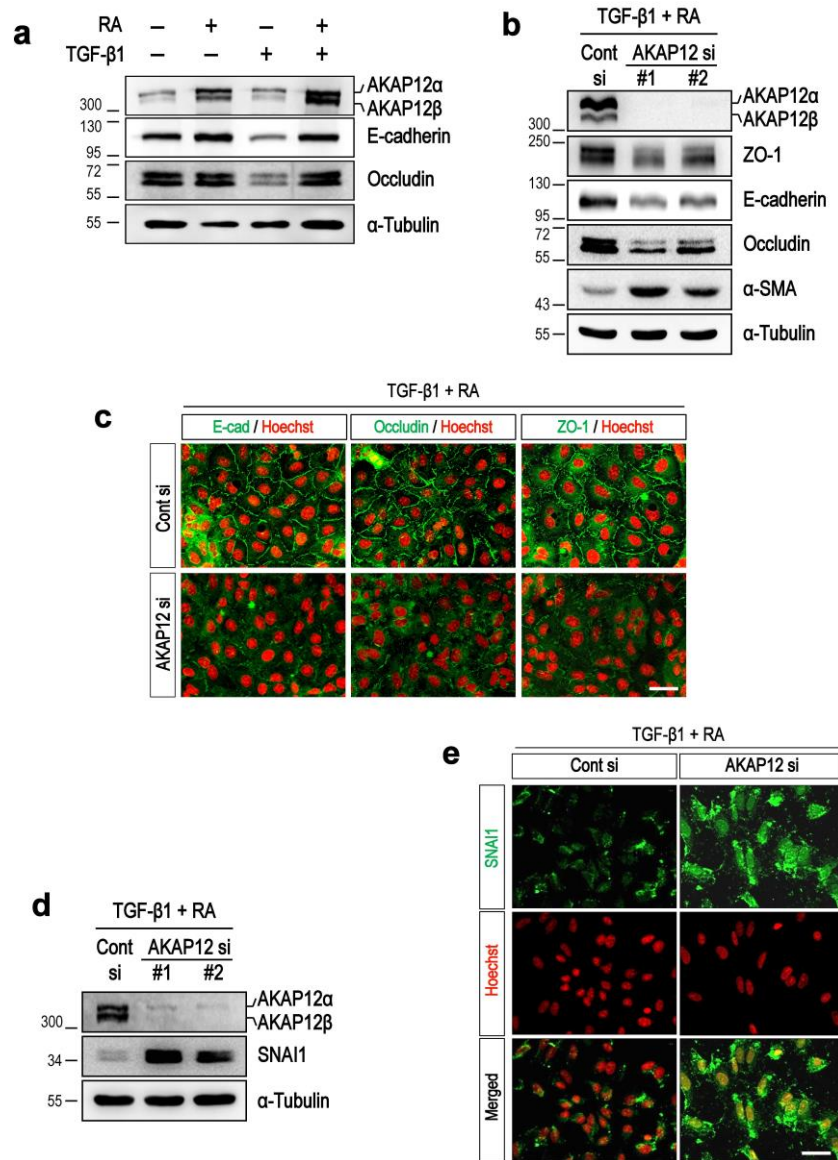

**Supplementary Figure 3. Results from the *in vitro* assay with the ARPE-19 cell line were confirmed with the A549 cell line** (a) A549 cells were serum starved for 24 h, and then treated with TGF- $\beta$ 1 (10 ng/mL) and RA (10  $\mu$ M) for 72 h. (b) Transfected A549 cells were serum starved for 24 h and incubated in the presence of TGF- $\beta$ 1 (10 ng/mL) and RA (10  $\mu$ M) for 72 h. (c) Transfected A549 cells were immunostained with antibodies for E-cadherin, occludin, and ZO-1. Nuclei were stained with Hoechst 33342 (pseudo-colored red). Scale bar: 40  $\mu$ m. (d) Transfected A549 cells were serum starved for 6 h and then treated with TGF- $\beta$ 1 (10 ng/mL) and RA (10  $\mu$ M) for 24 h. (e) After serum starvation for 24 h, transfected A549 cells were treated with TGF- $\beta$ 1 (10 ng/mL) and RA (10  $\mu$ M) for 24 h. Nuclei were stained with Hoechst (pseudo-colored red). Scale bar: 40  $\mu$ m. Each panel represents the results from independent experiments repeated at least four times.

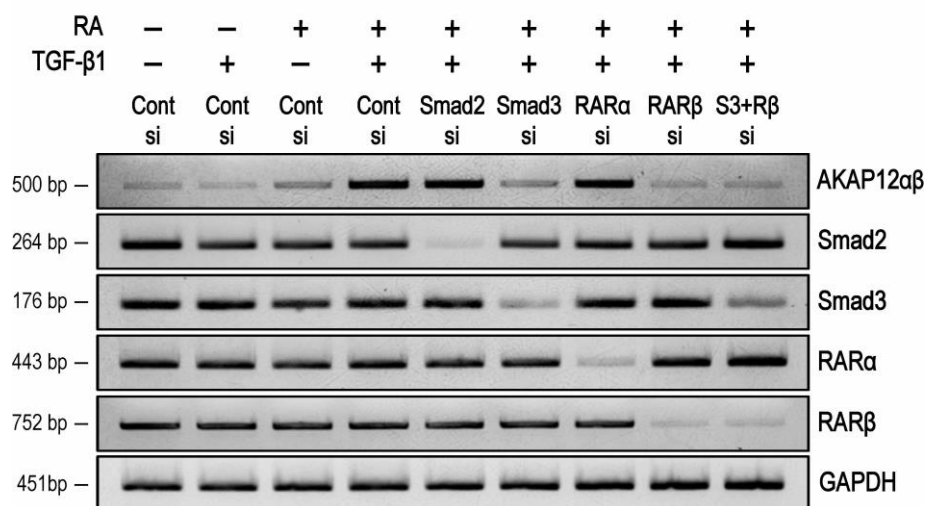

**Supplementary Figure 4. Smad3 and RAR $\beta$  mediate the induction of AKAP12 by TGF- $\beta$ 1 and RA** ARPE-19 cells were co-transfected with control, Smad2, Smad3, RAR $\alpha$ , and RAR $\beta$  siRNA. Knockdown cells were treated with TGF- $\beta$ 1 (10 ng/mL) and RA (10  $\mu$ M) for 24 h after serum starvation for 24 h. Reverse transcription PCR was performed and GAPDH was used as an internal control. Knockdown of Smad3 and RAR $\beta$  specifically neutralized the induction of AKAP12 with co-treatment of TGF- $\beta$ 1 and RA. This data represents the results from independent four experiments.

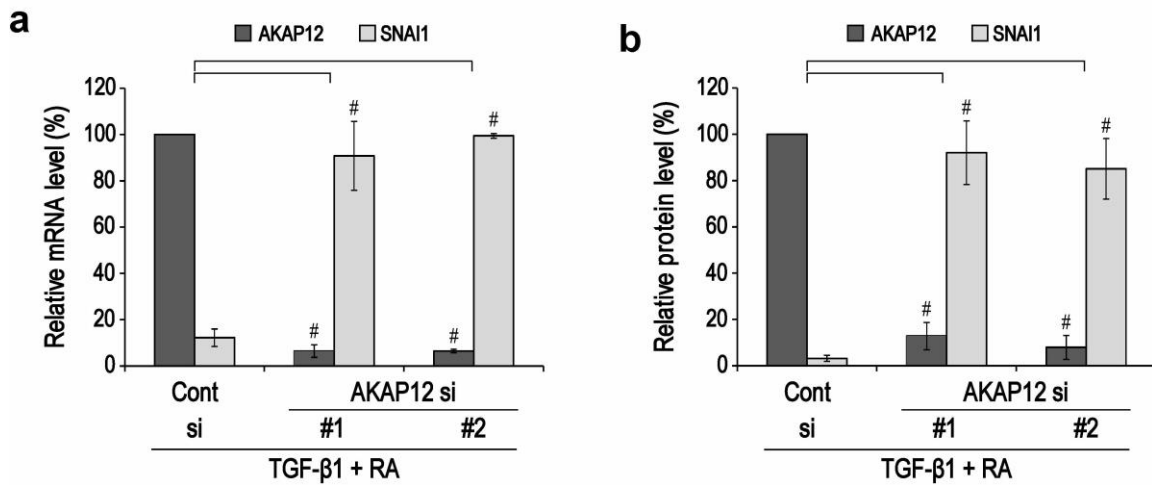

**Supplementary Figure 5. AKAP12 knockdown increases the expression of SNAI1** Two different AKAP12 siRNA were transfected into ARPE-19 cells. (a) After serum starvation for 6 h, AKAP12 knockdown cells were treated with TGF- $\beta$ 1 (10 ng/mL) and RA (10  $\mu$ M) for 24 h. The mRNA levels were analyzed with reverse transcription PCR. Data were obtained from three independent experiments (mean  $\pm$  S.D., ANOVA followed by Tukey-Kramer test: #P < 0.0005). (b) After serum starvation for 24 h, AKAP12 knockdown cells were treated with TGF- $\beta$ 1 (10 ng/mL) and RA (10  $\mu$ M) for 24 h. Protein levels were determined by western blot analysis. Data were obtained from three independent experiments (mean  $\pm$  S.D., ANOVA followed by Tukey-Kramer test: #P < 0.0005). Band intensities were analyzed with Image J and normalized to  $\alpha$ -tubulin (a) and GAPDH (b).

**Fig. 2b**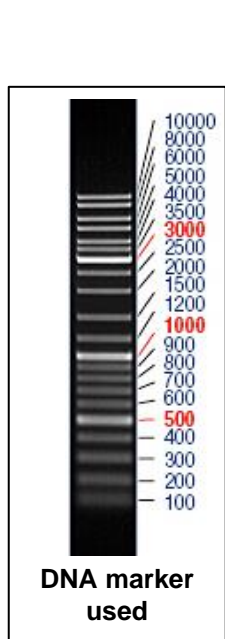

TGF-1 $\beta$  - + - - + +  
RA - - 5uM 10uM 5uM 10uM

**Fig. 2d**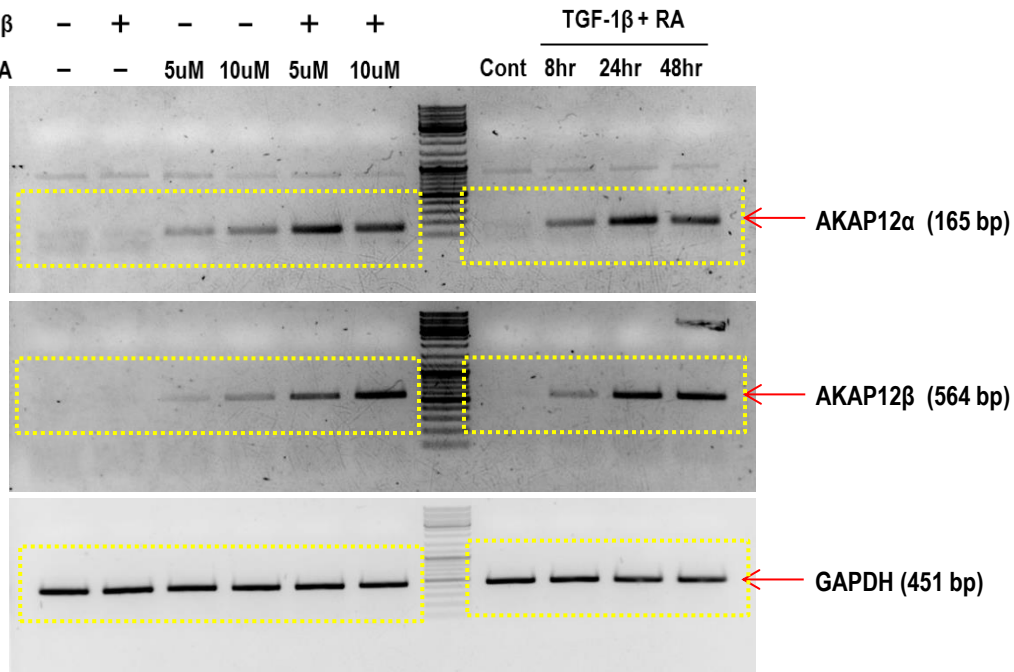**Fig. 2c** Band intensities were analyzed with Image J and normalized to  $\alpha$ -tubulin. Results were presented as a graph.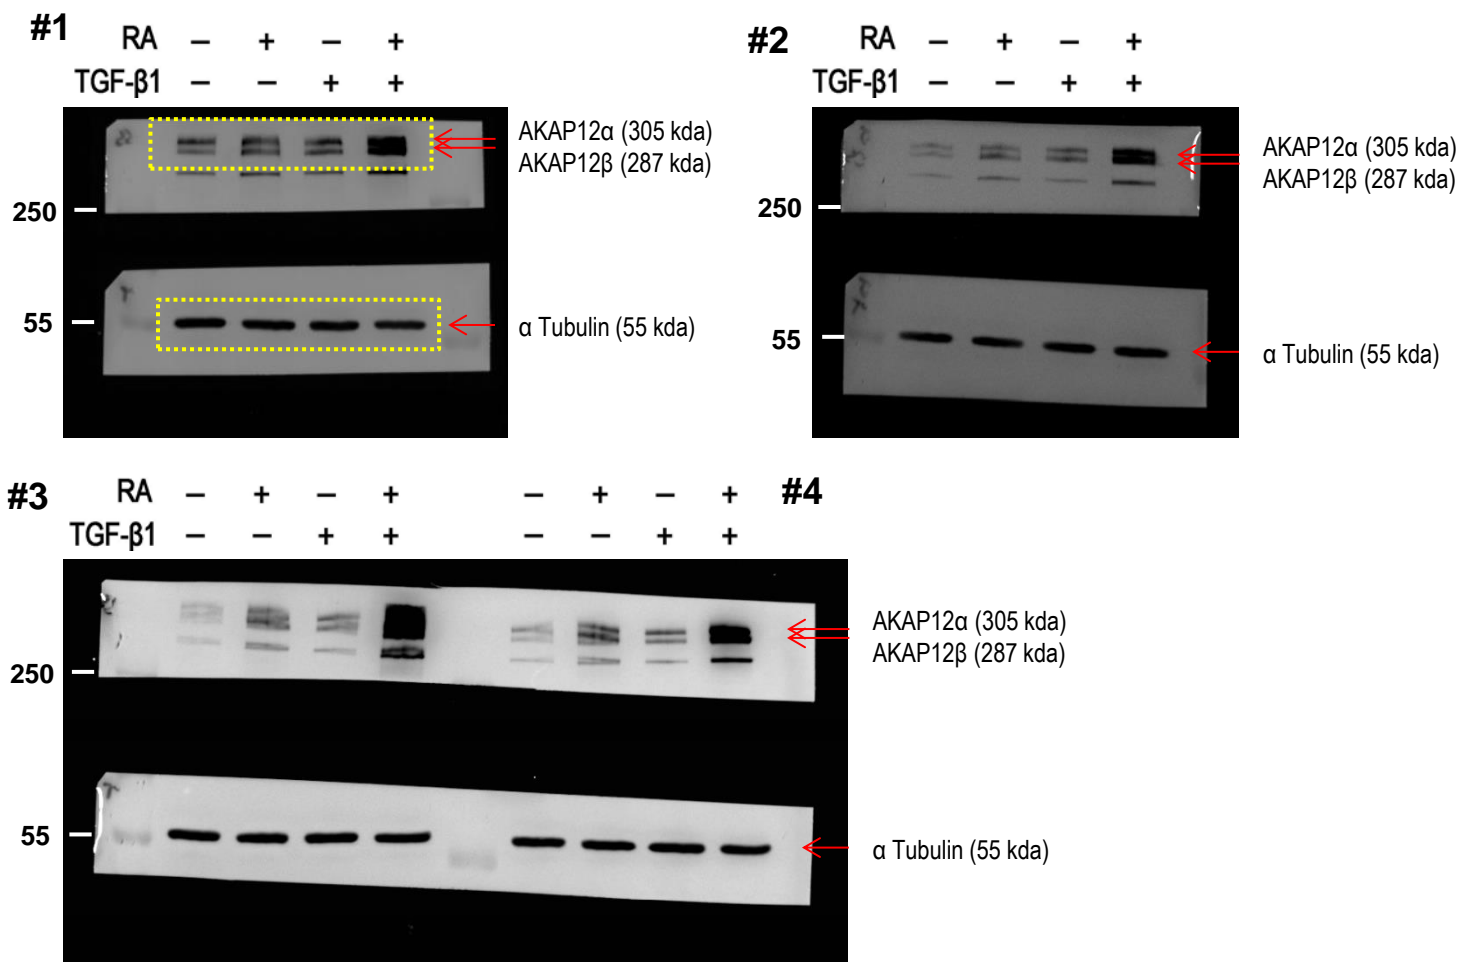**Supplementary Figure 6. Full scans of uncropped SDS-PAGE and PCR-DNA gel** Bands of yellow boxes were used in Figures.

**Fig. 2e**

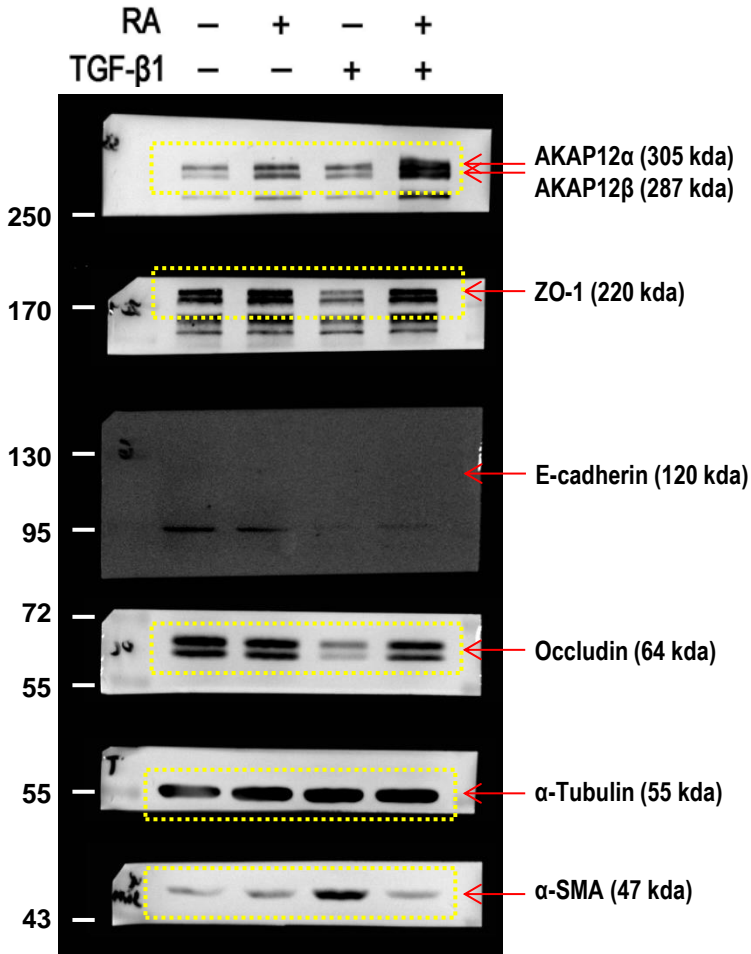

**Fig. 2f**

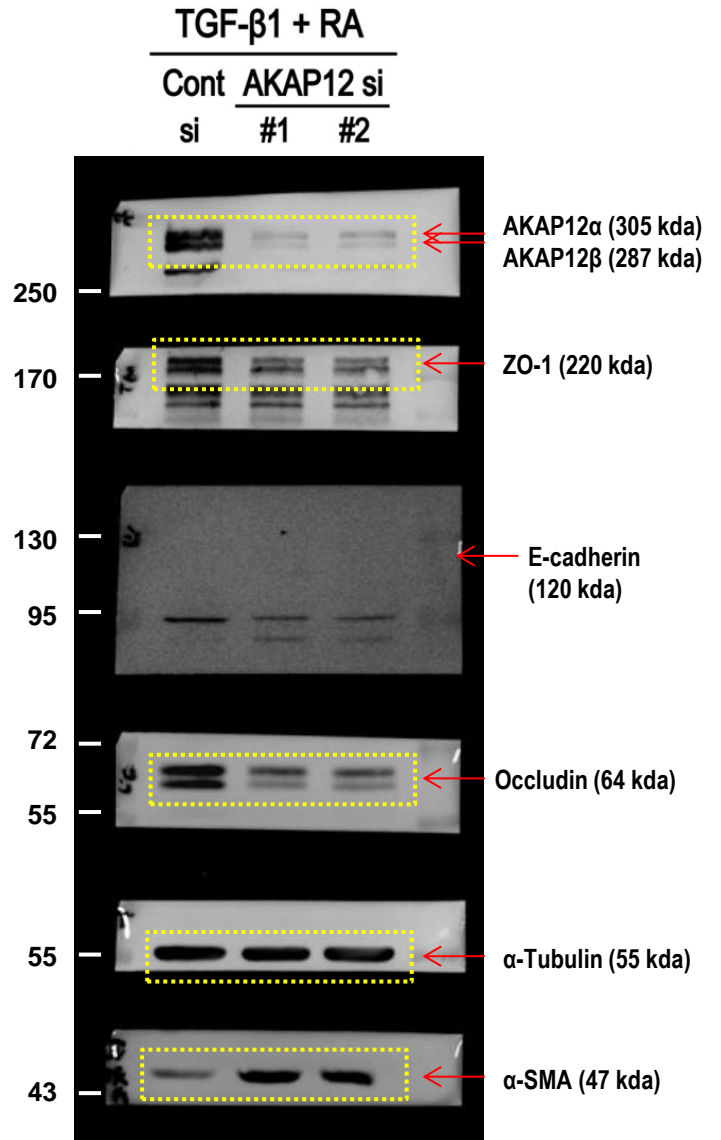

**Fig. 3c** Band intensities were analyzed with Image J and normalized to  $\alpha$ -tubulin. Results were presented as a graph.

**Group #1**

Cont PT1 PT3 PT7 PT14 PT21

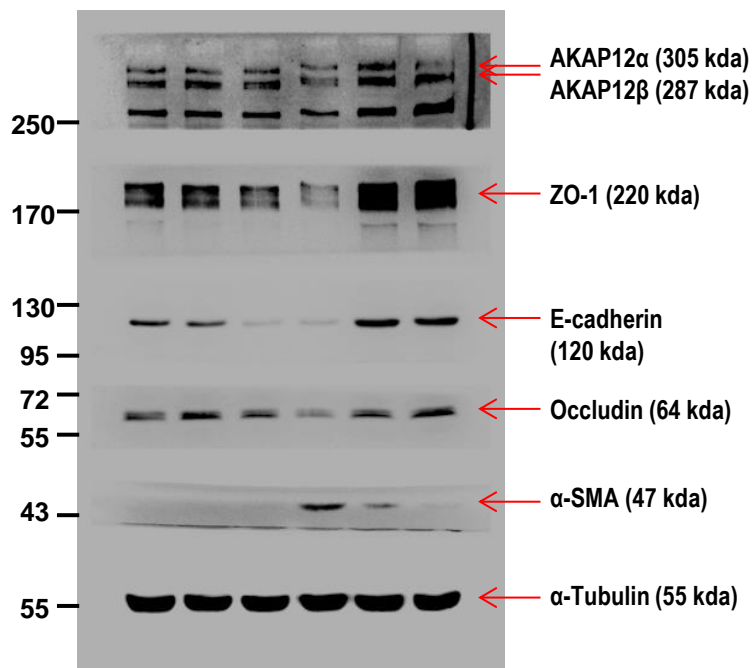

**Group #2**

Cont PT1 PT3 PT7 PT14 PT21

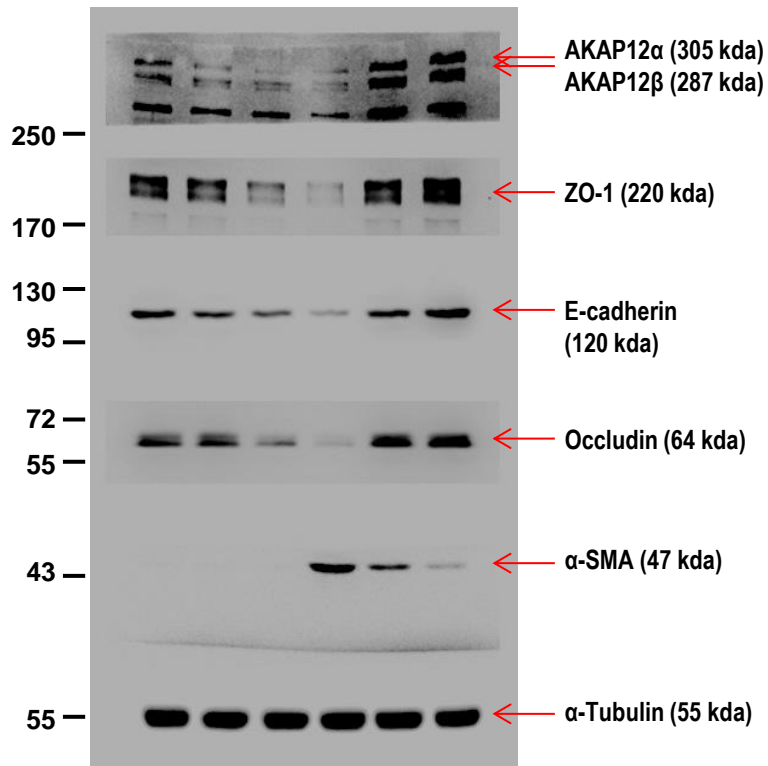

**Group #3**

Cont PT1 PT3 PT7 PT14 PT21

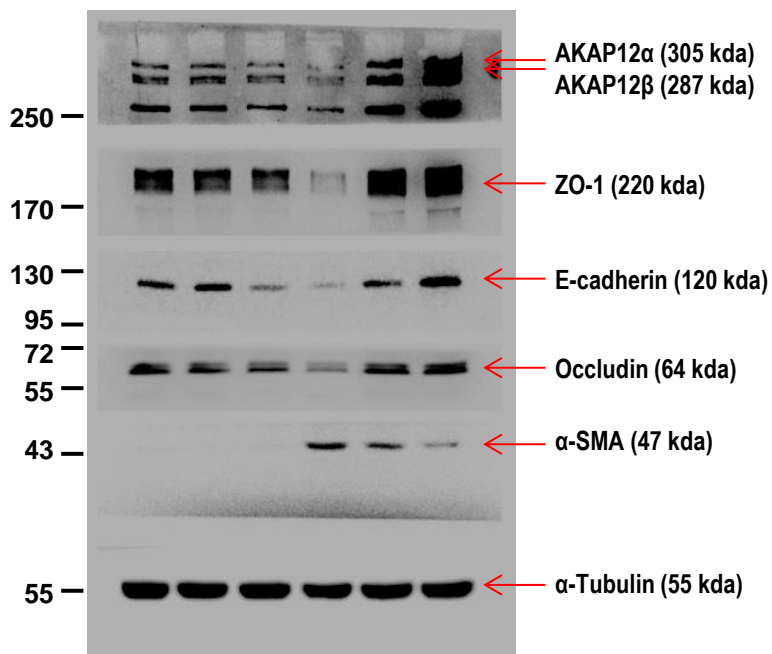



**Fig. 3c-continue**

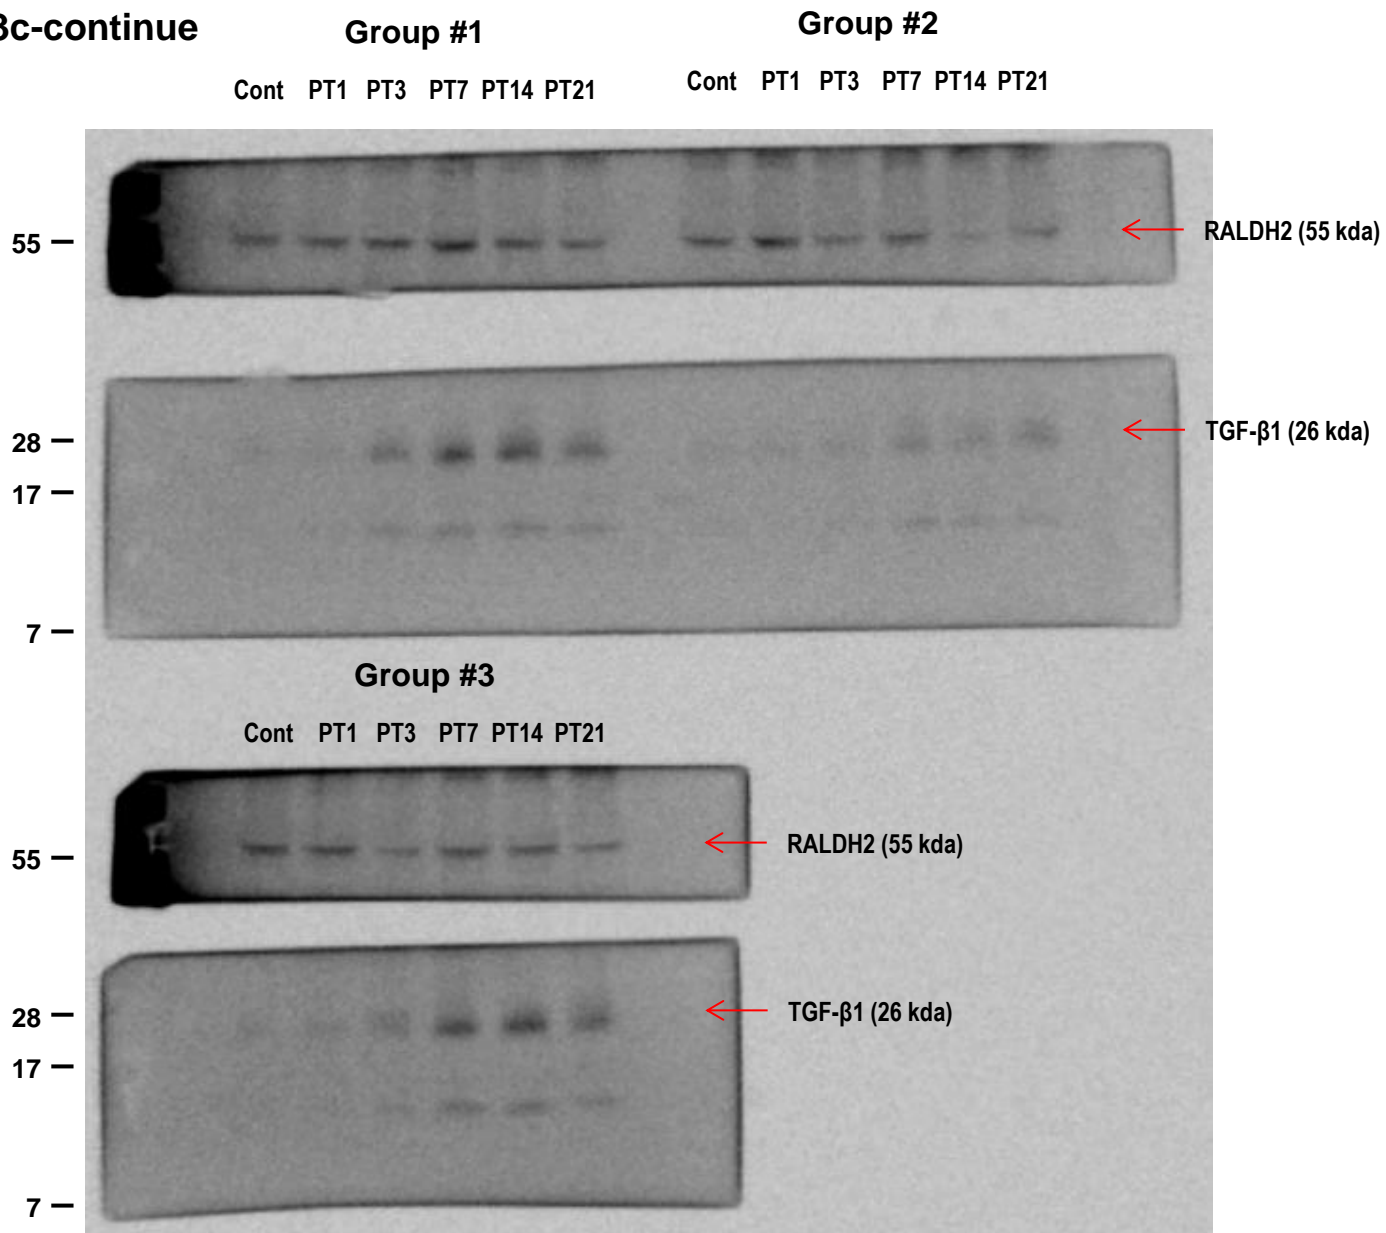

**Fig. 3e**

Band intensities were analyzed with Image J and normalized to  $\alpha$ -tubulin. Results were presented as a graph.

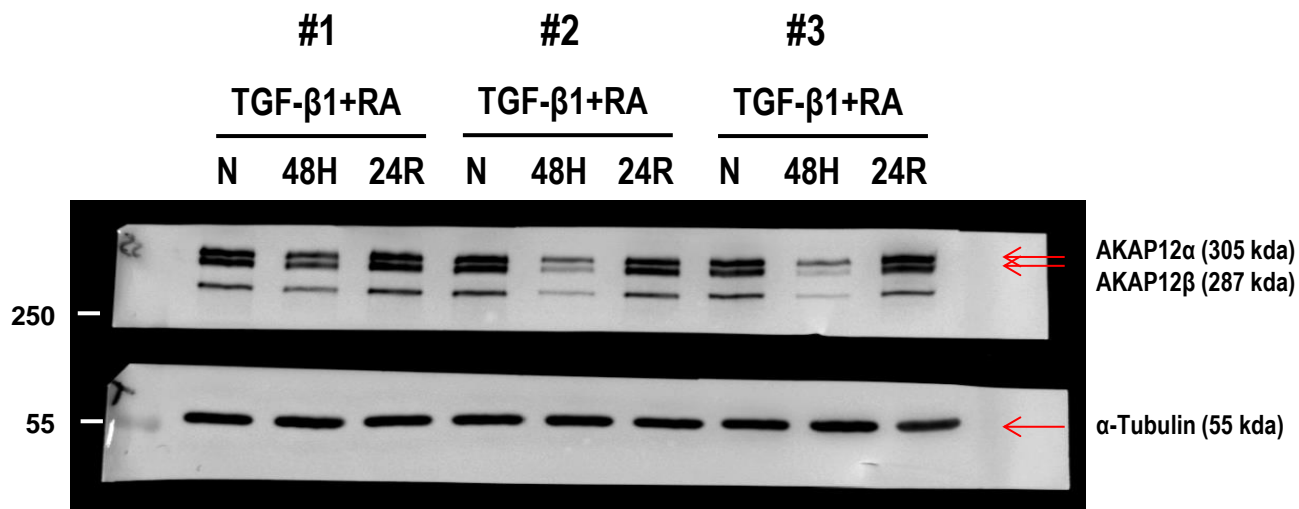

**Fig. 3f**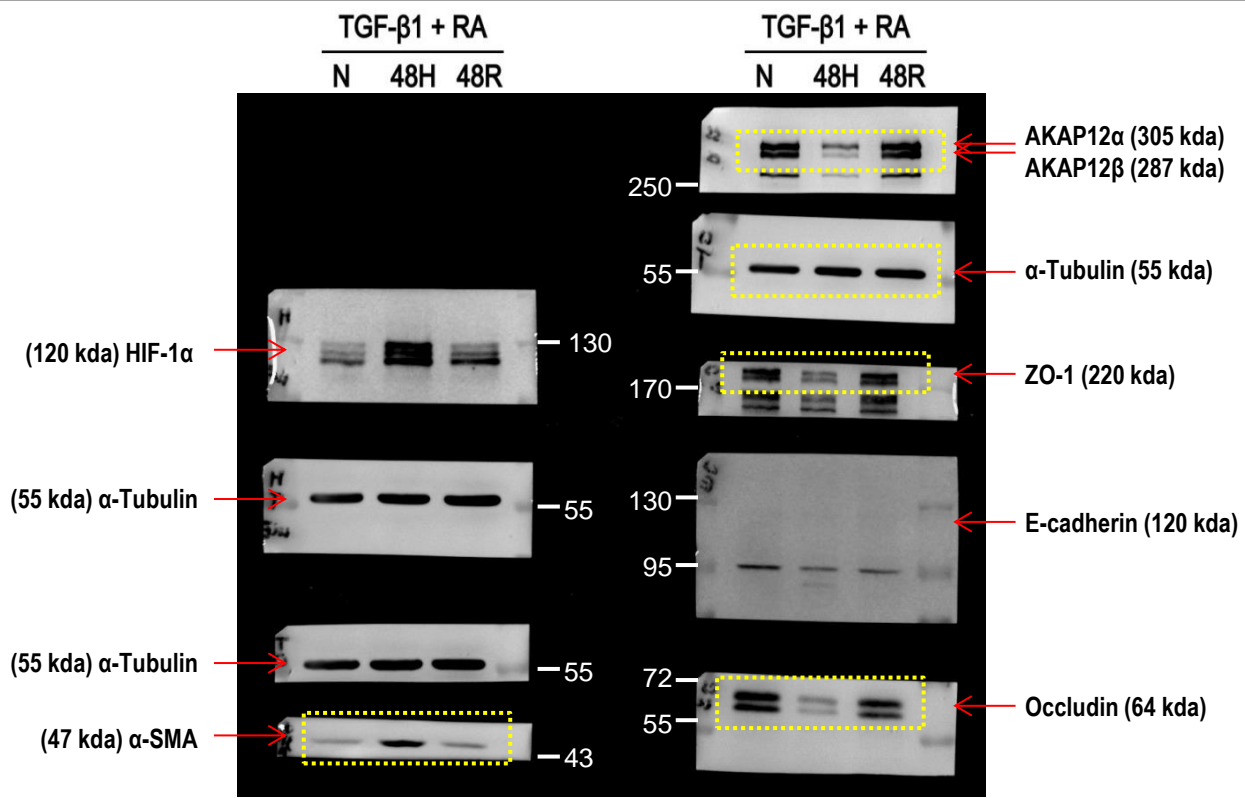**Fig. 4a**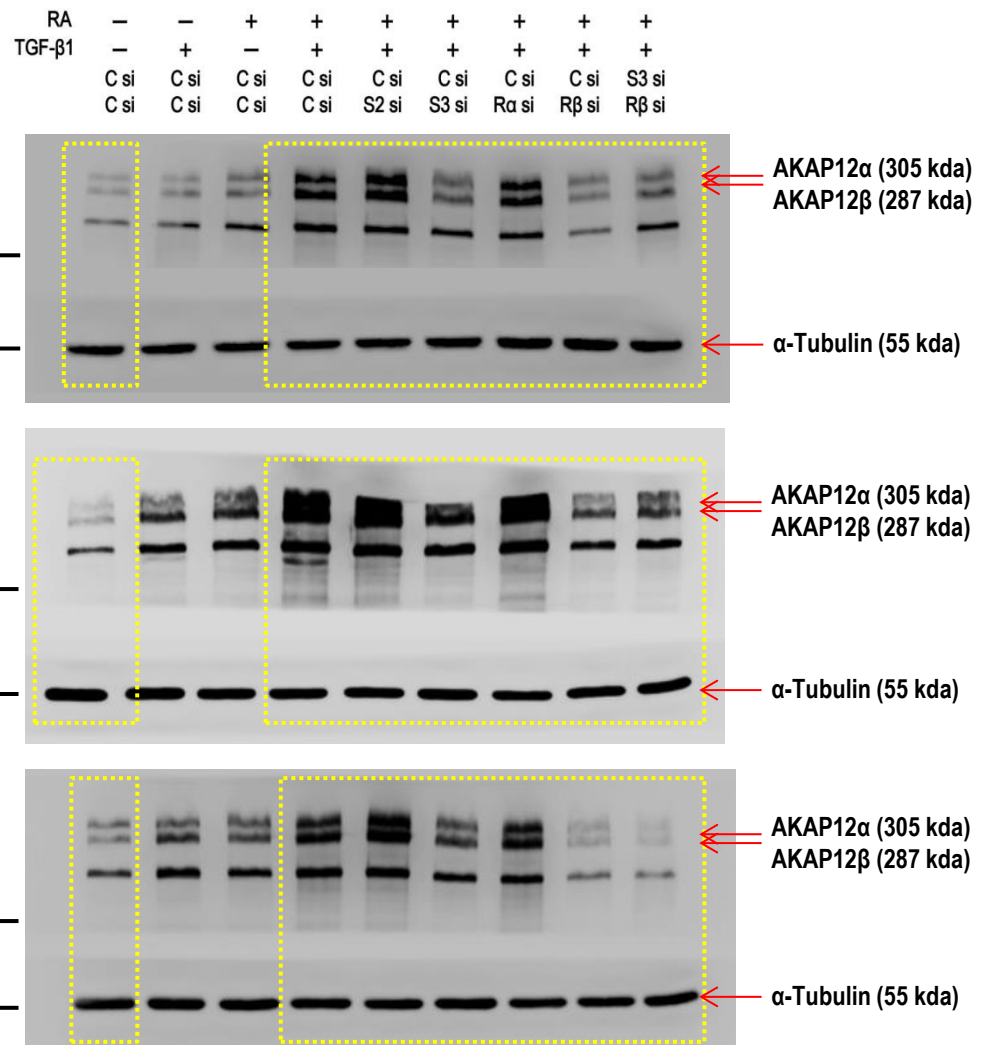

Band intensities of yellow boxes were analyzed with Image J and normalized to α-tubulin. Results were presented as a graph.

**Fig. 4b**

**Western blot**

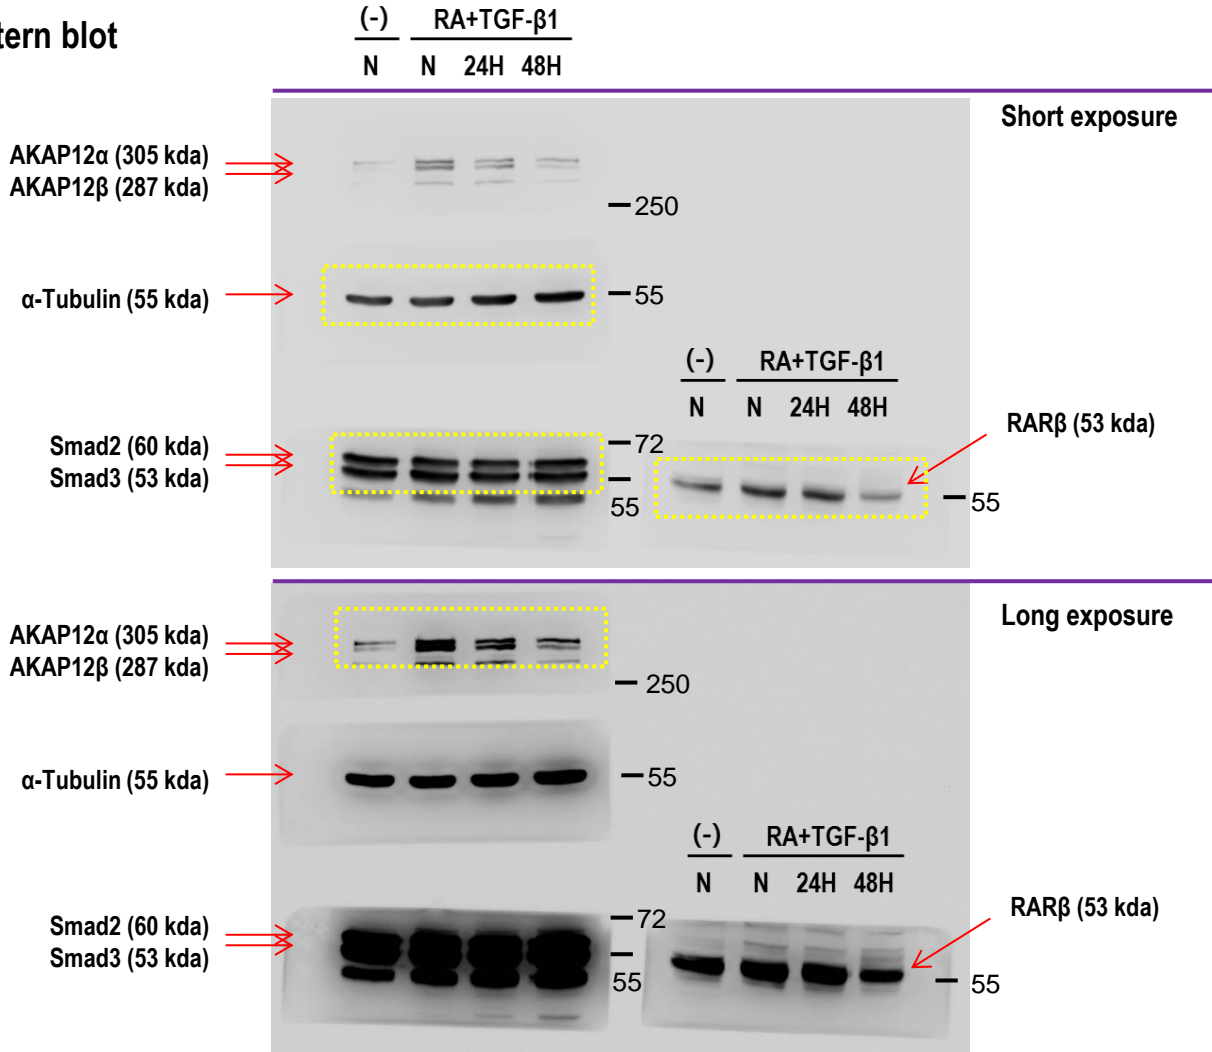

**PCR**

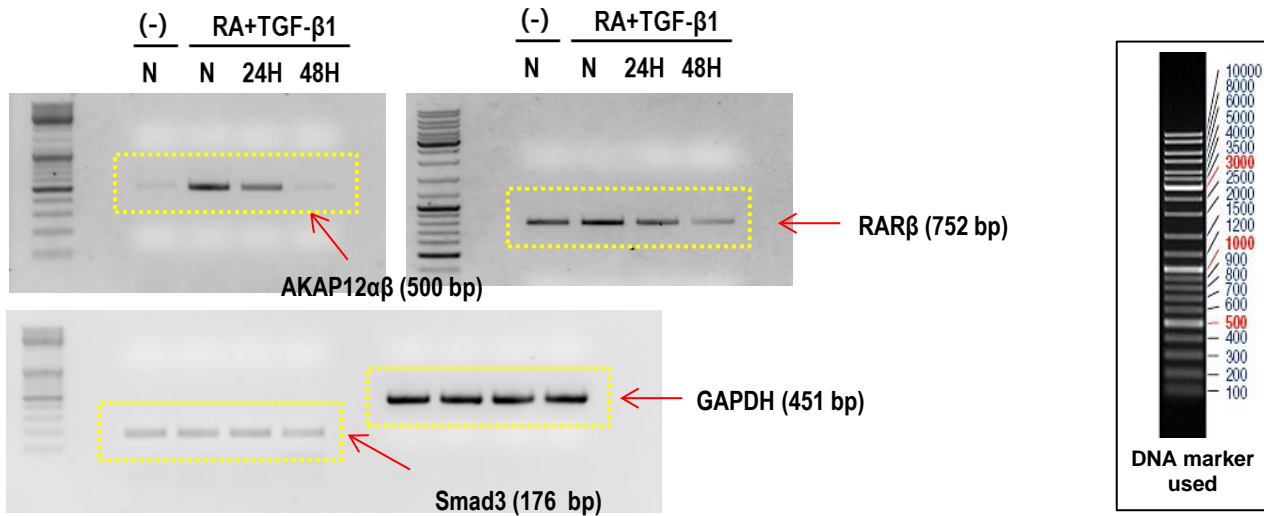

**Fig. 4C**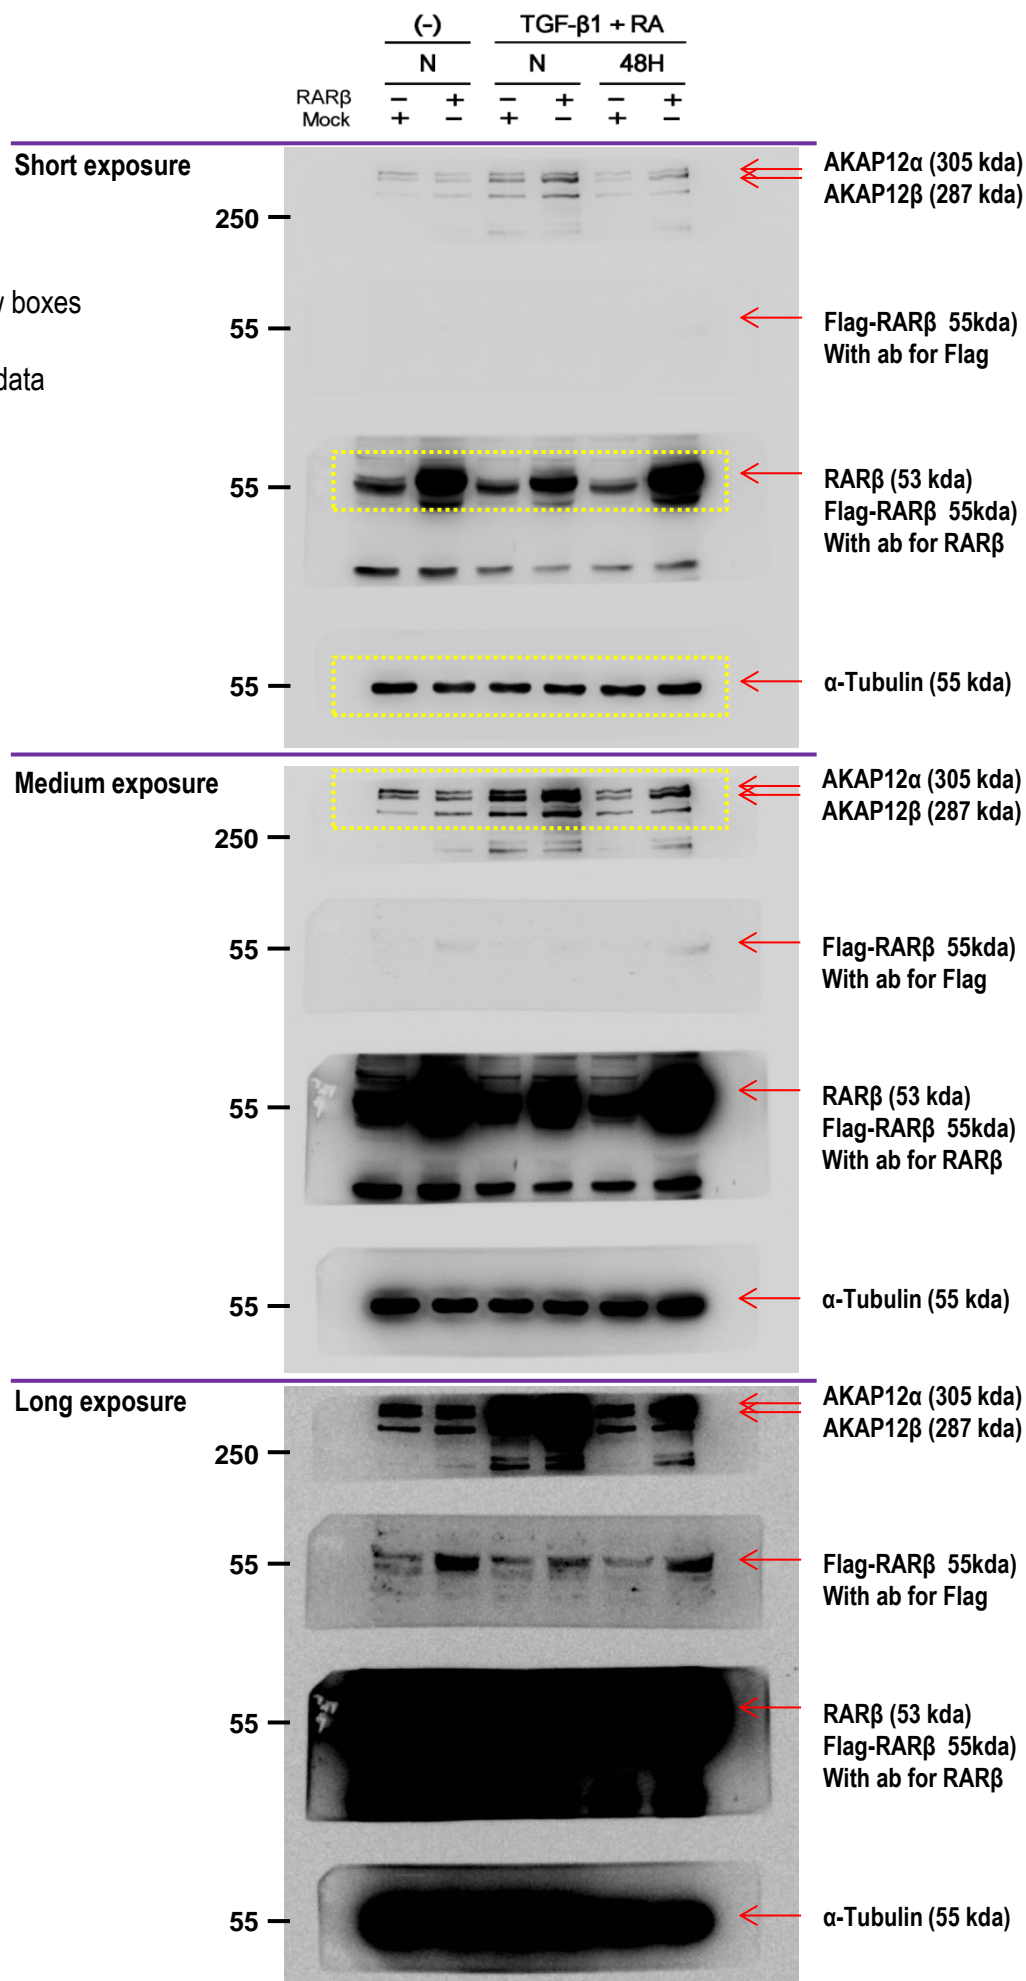

Bands of yellow boxes were used as representative data

**Fig. 5a and Supplementary Fig. 5a**

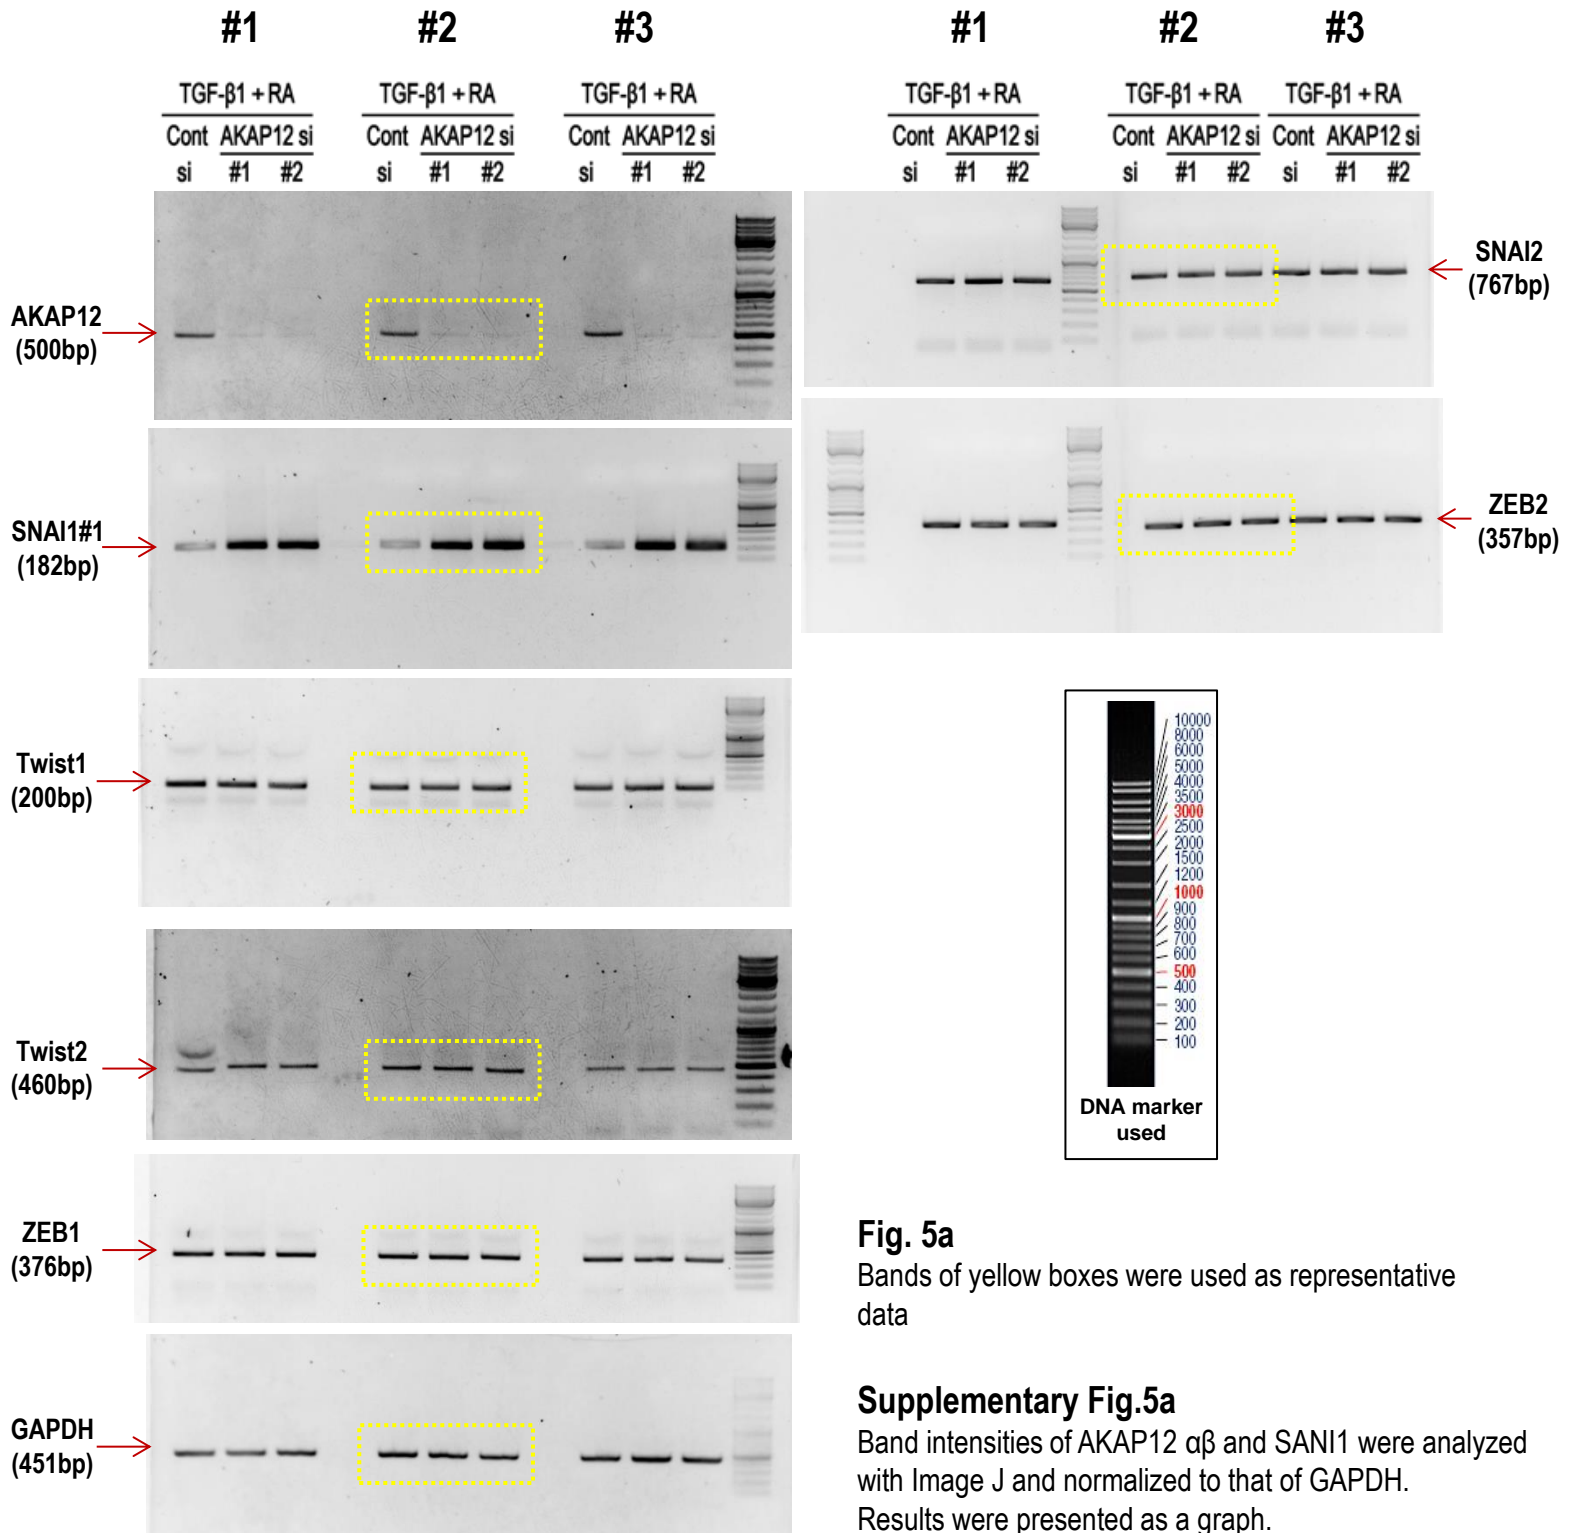

**Fig. 5a**

Bands of yellow boxes were used as representative data

**Supplementary Fig.5a**

Band intensities of AKAP12  $\alpha\beta$  and SNAI1 were analyzed with Image J and normalized to that of GAPDH. Results were presented as a graph.

**Fig. 5b and Supplementary Fig. 5b**

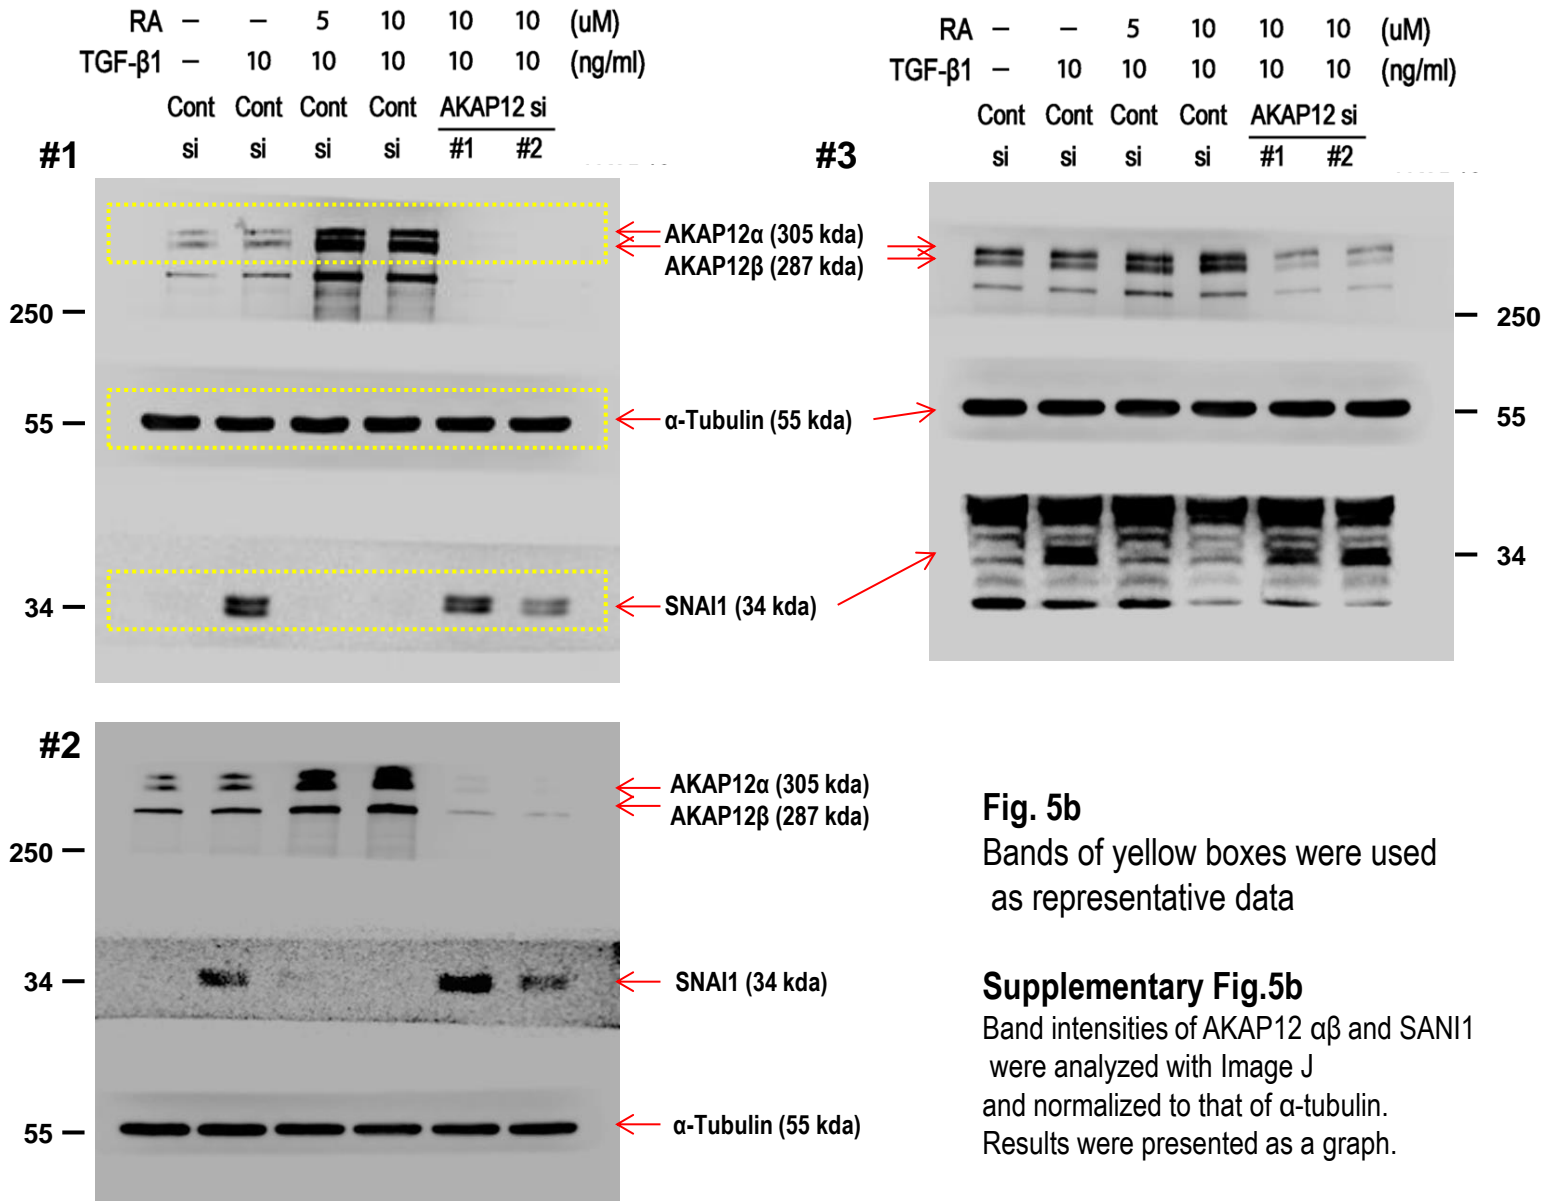

**Fig. 5b**

Bands of yellow boxes were used as representative data

**Supplementary Fig.5b**

Band intensities of AKAP12 αβ and SNAI1 were analyzed with Image J and normalized to that of α-tubulin. Results were presented as a graph.

**Fig. 5d**

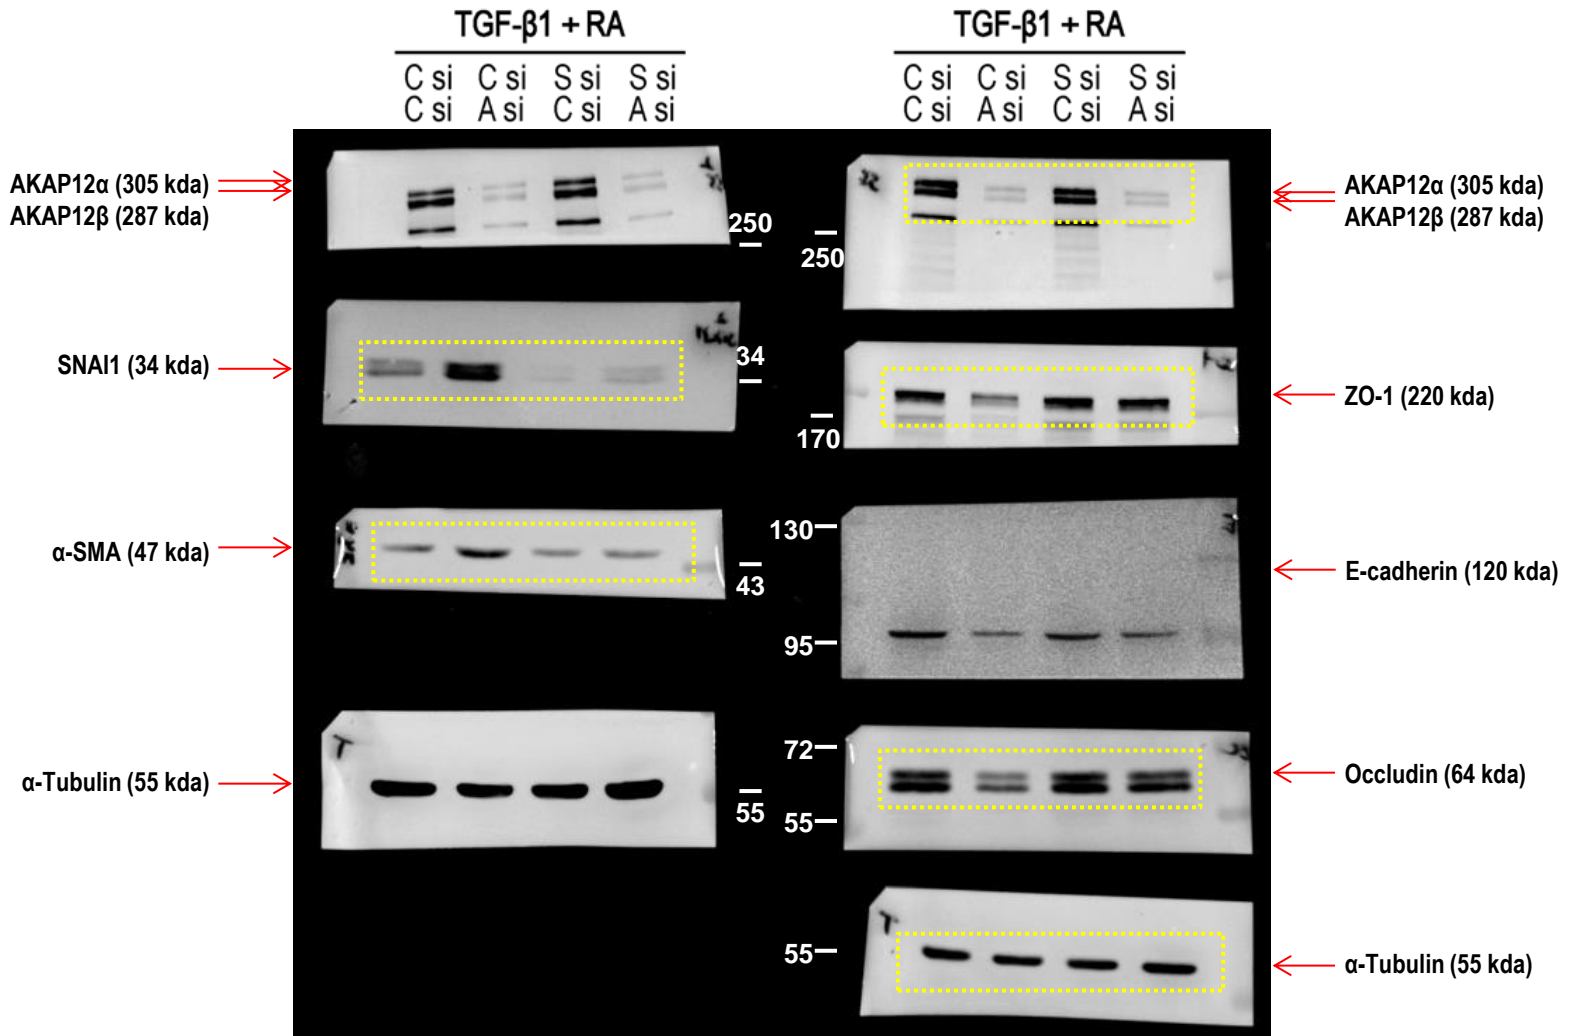

**Supplementary Figure 6. Continued**

**Fig. 6a**

**Short exposure**

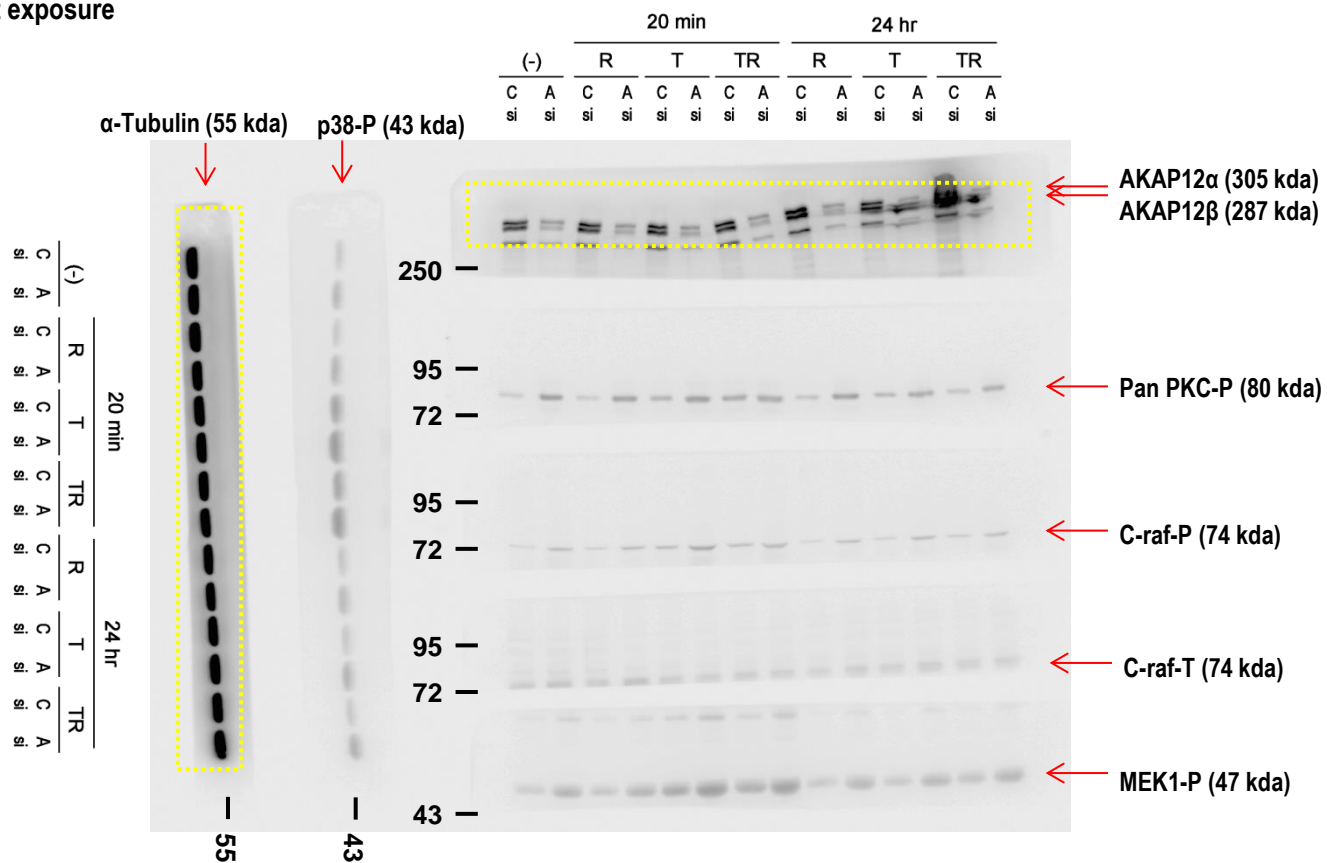

**Long exposure**

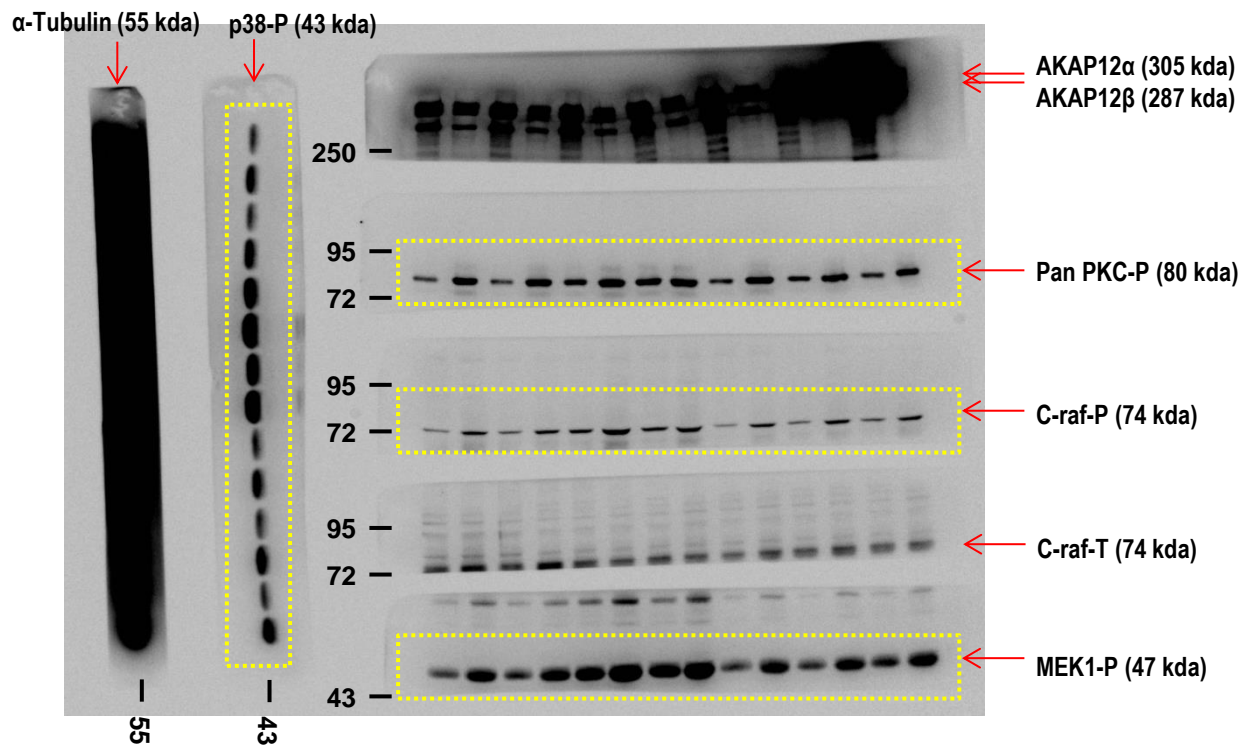



**Fig. 6a-continue**

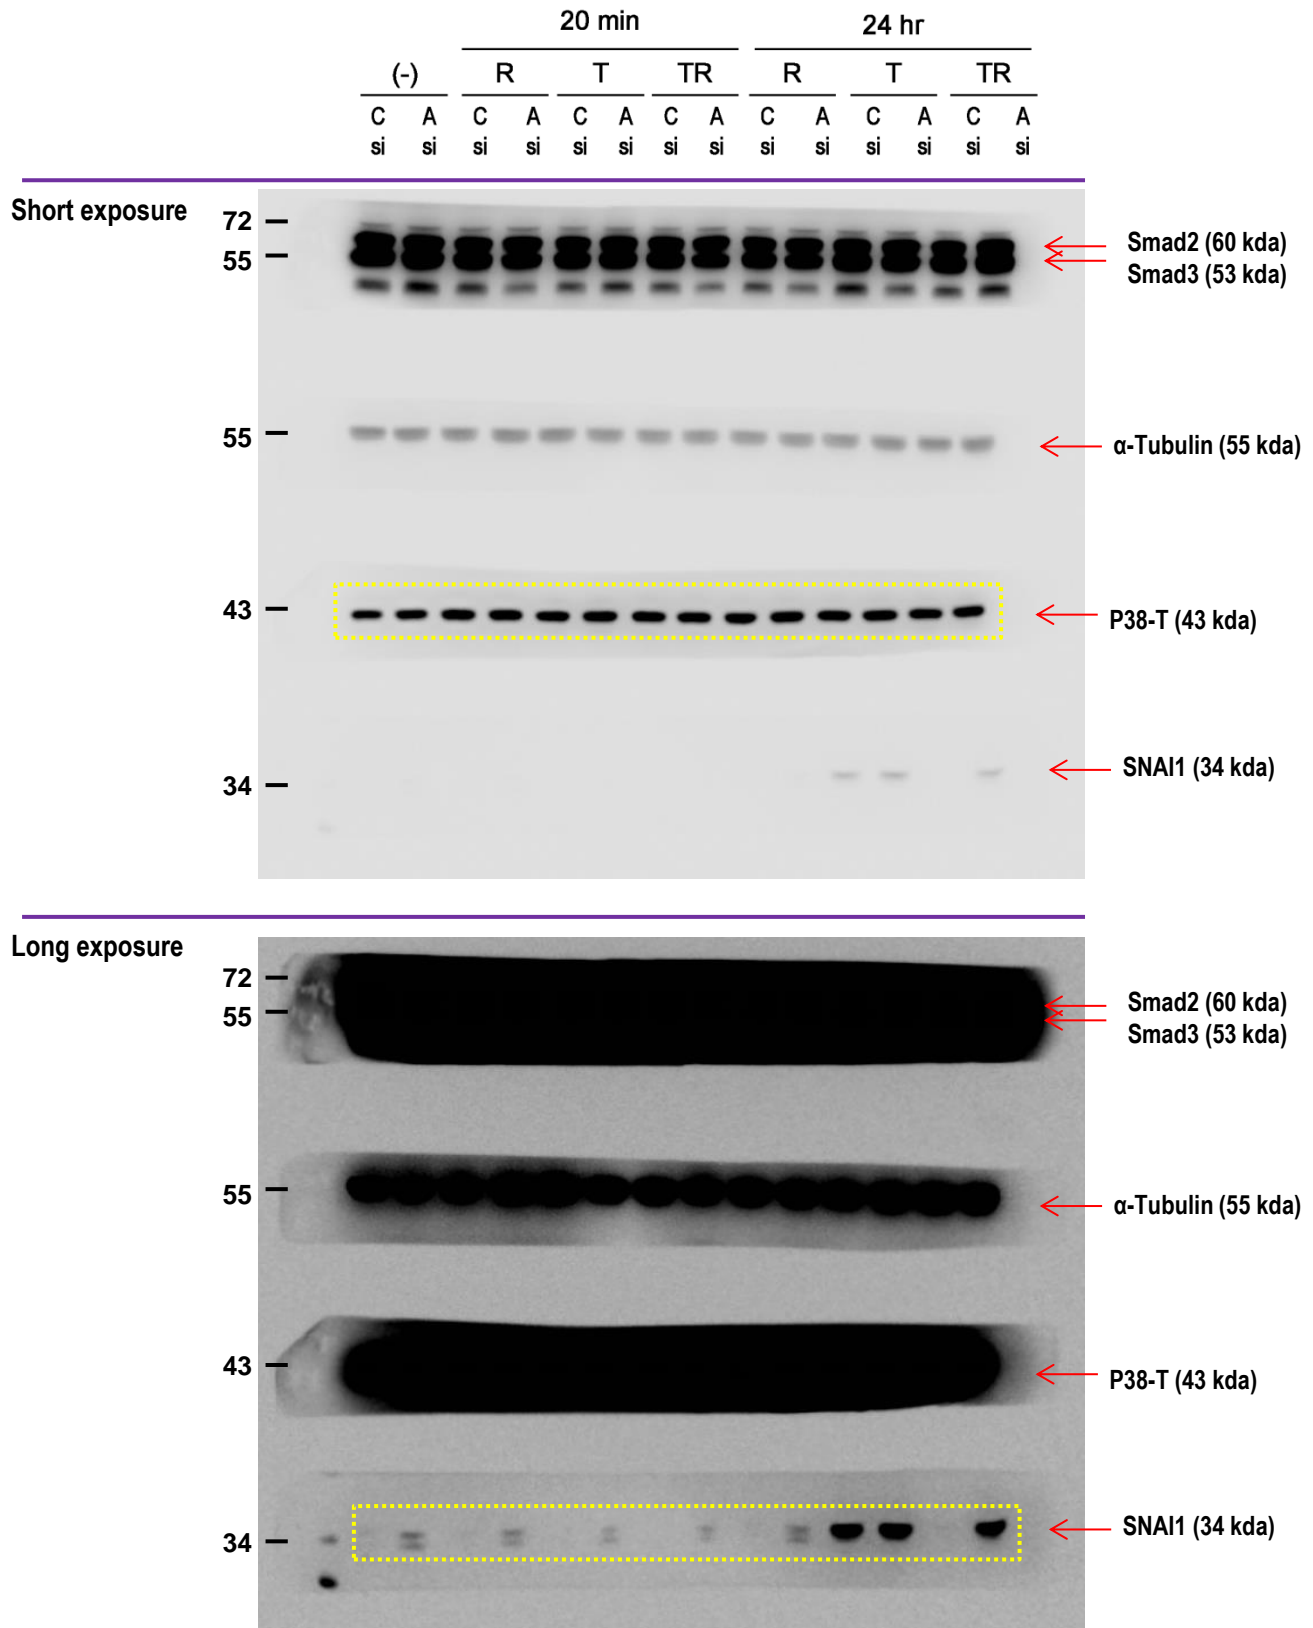

**Supplementary Figure 6. Continued**

**Fig. 6a-continue**

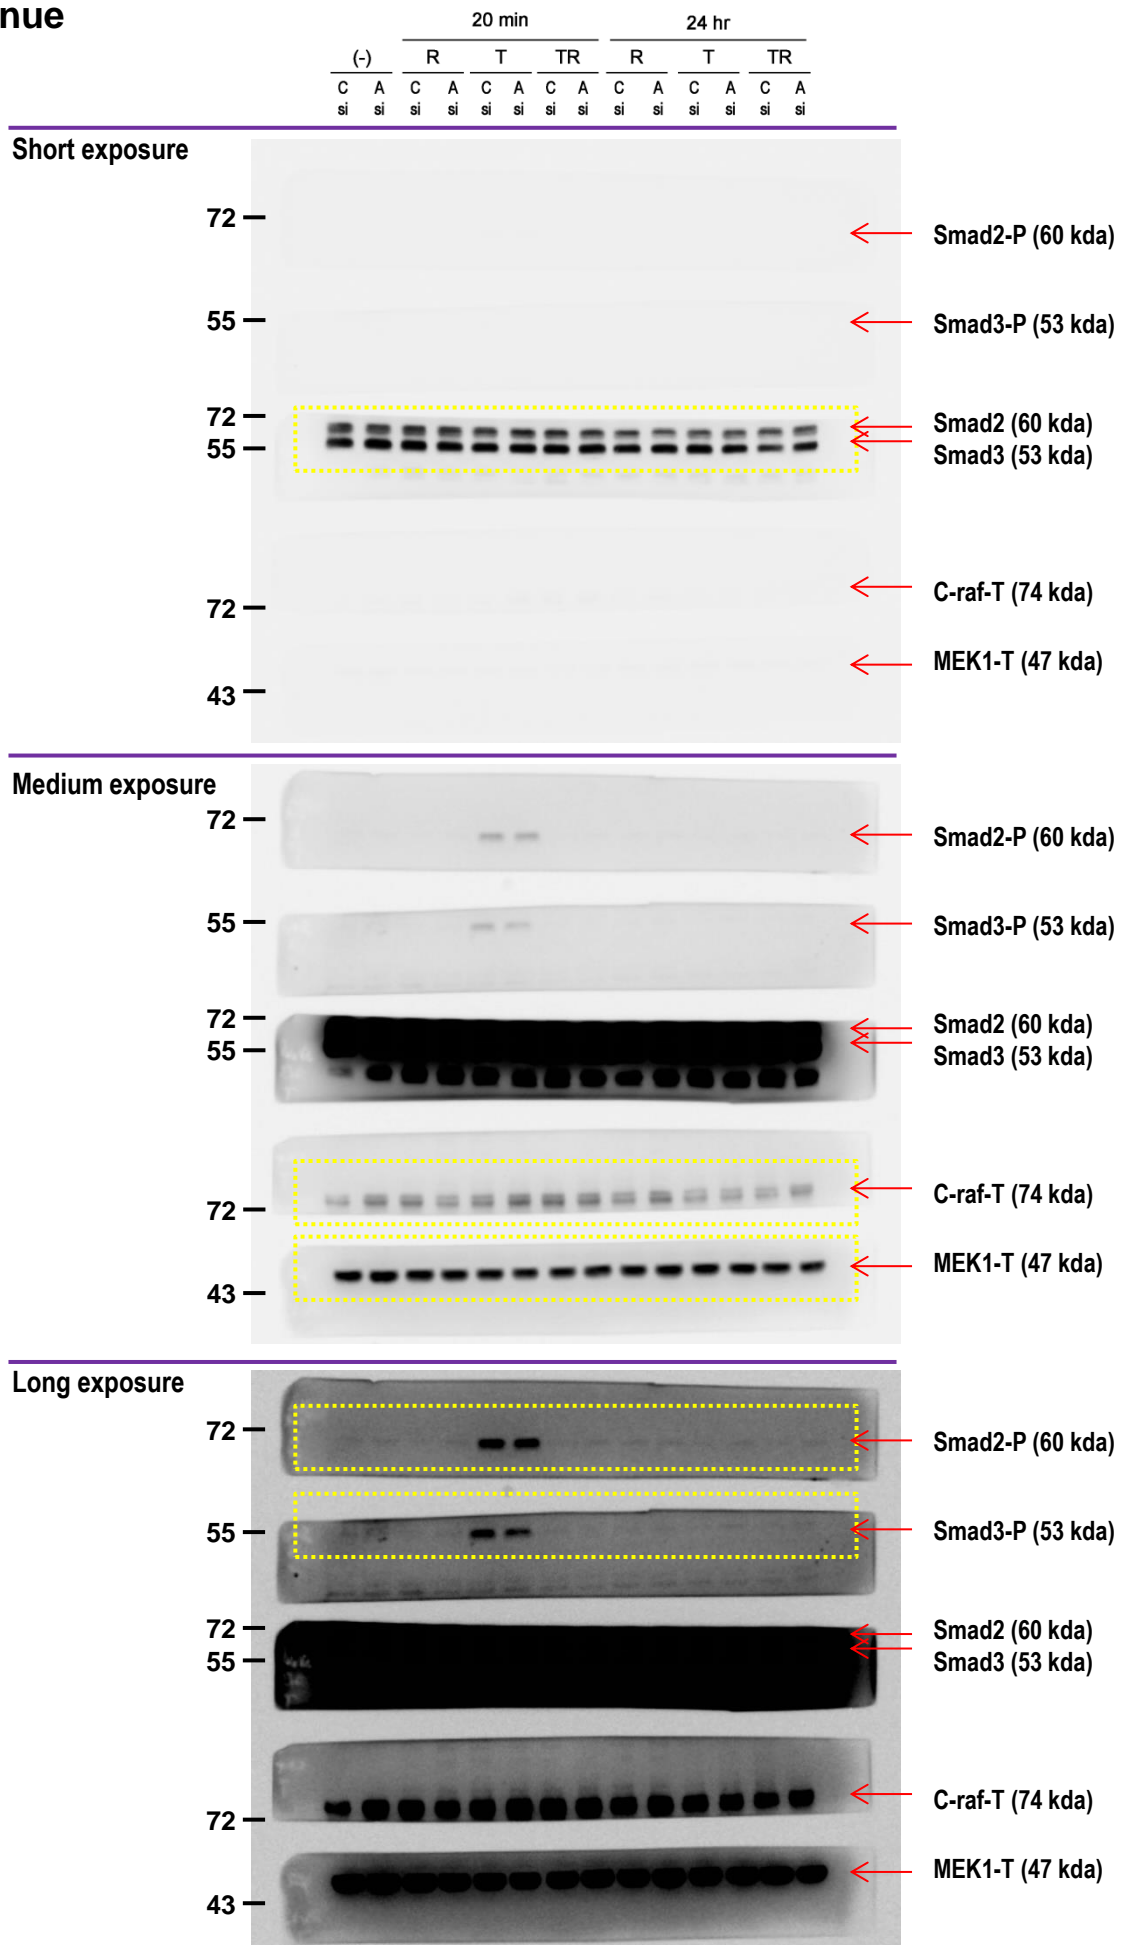

**Fig. 6b**

Bands of yellow boxes were used as representative data

Band intensities of AKAP12  $\alpha\beta$  and SNAI1 were analyzed with Image J and normalized to that of  $\alpha$ -tubulin. Results were presented as a graph.

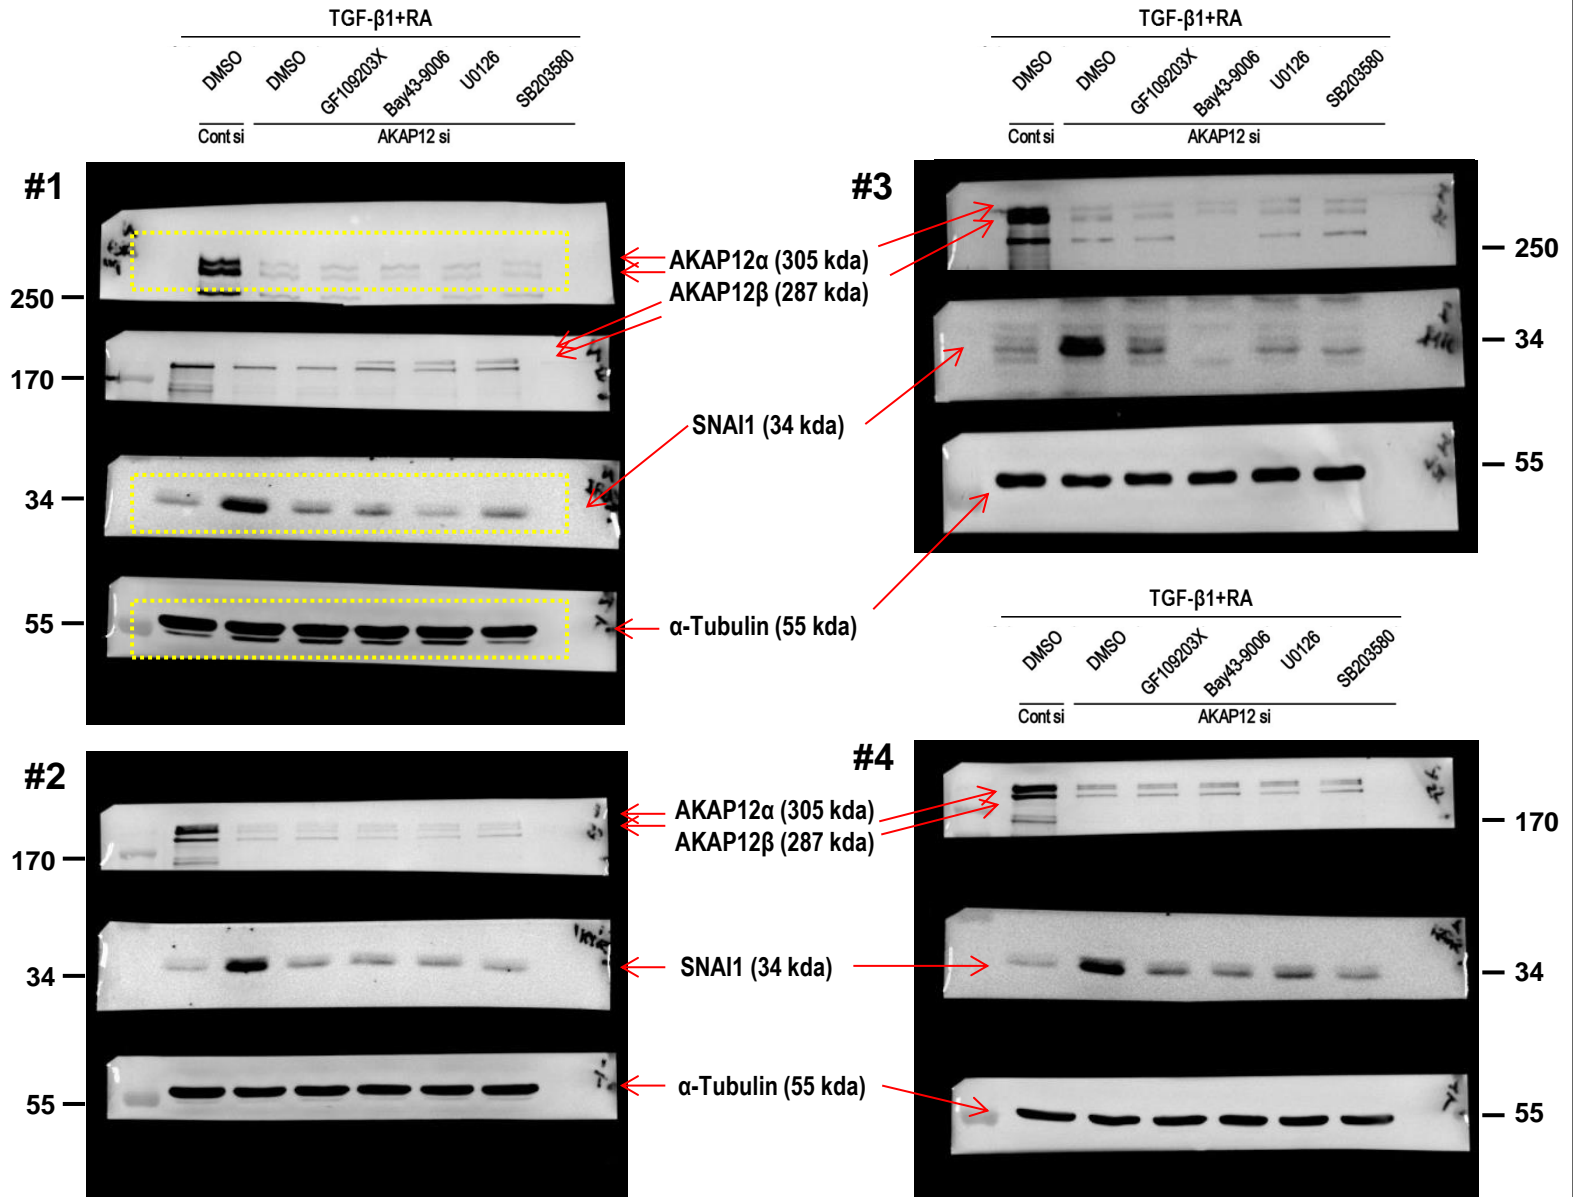**Supplementary Figure 6. Continued**

**Fig. 6c**

Bands of yellow boxes were used as representative data

AKAP12, SNAI1, and pan-PKC-P densities were normalized to that of  $\alpha$ -tubulin.

The densities of MEK-P and p38-P were normalized to that of total MEK and total p38, respectively.

Results were presented as a graph

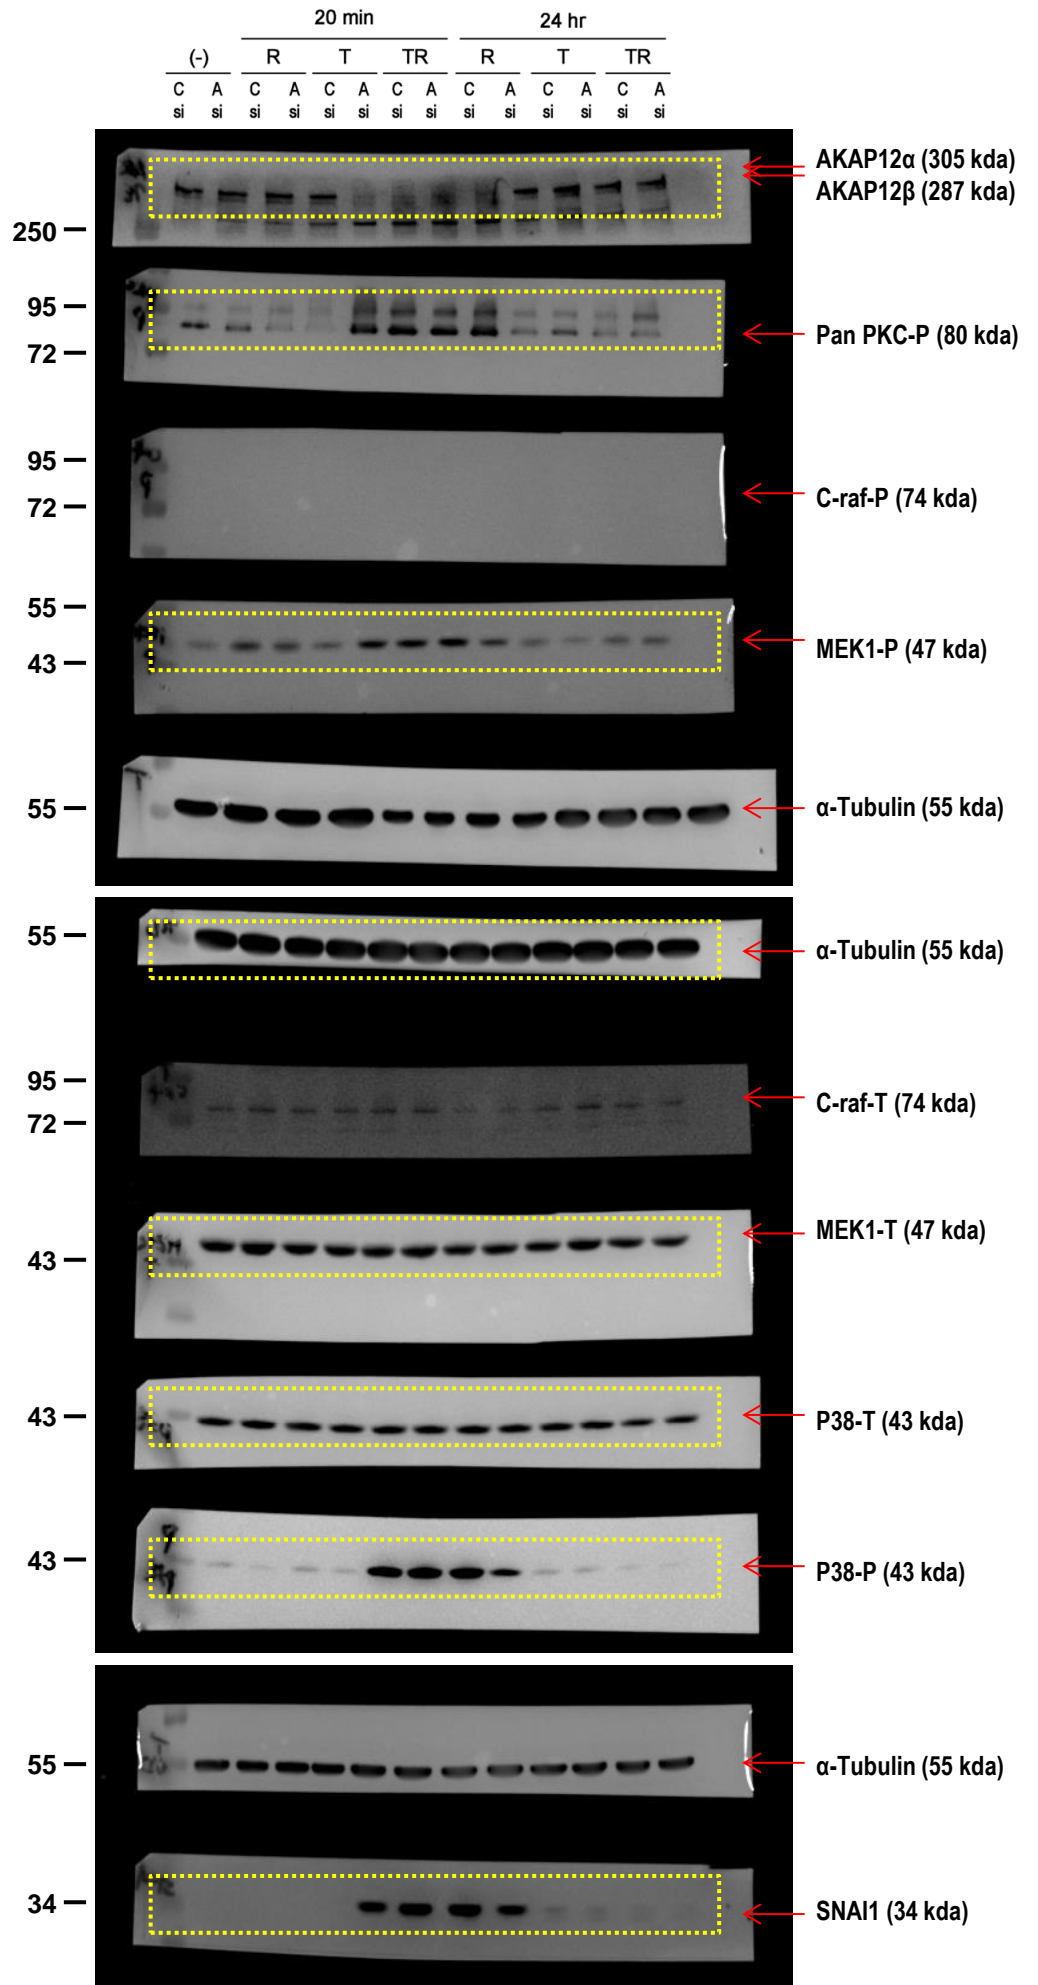

Supplementary Fig. 2b

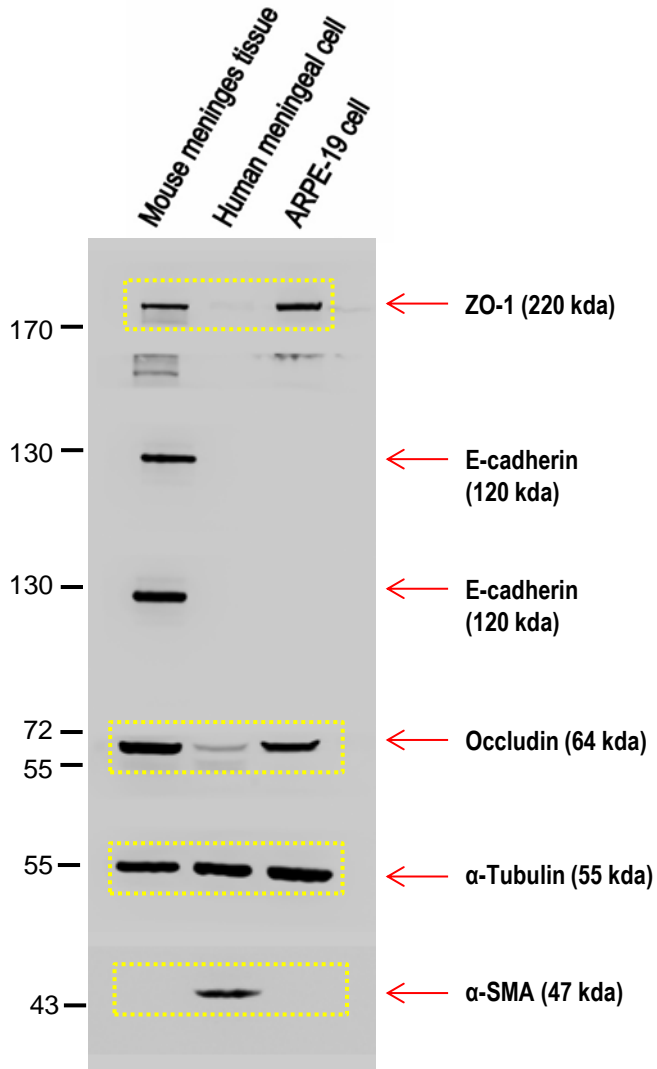

Supplementary Fig. 2d

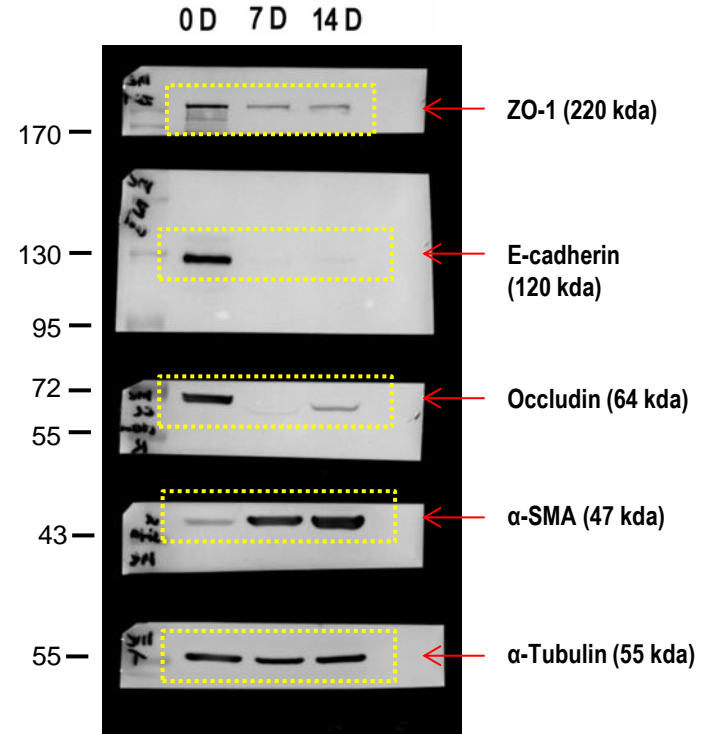

Supplementary Figure 6. Continued

**Supplementary Fig. 3a** Bands of yellow boxes were used as representative data

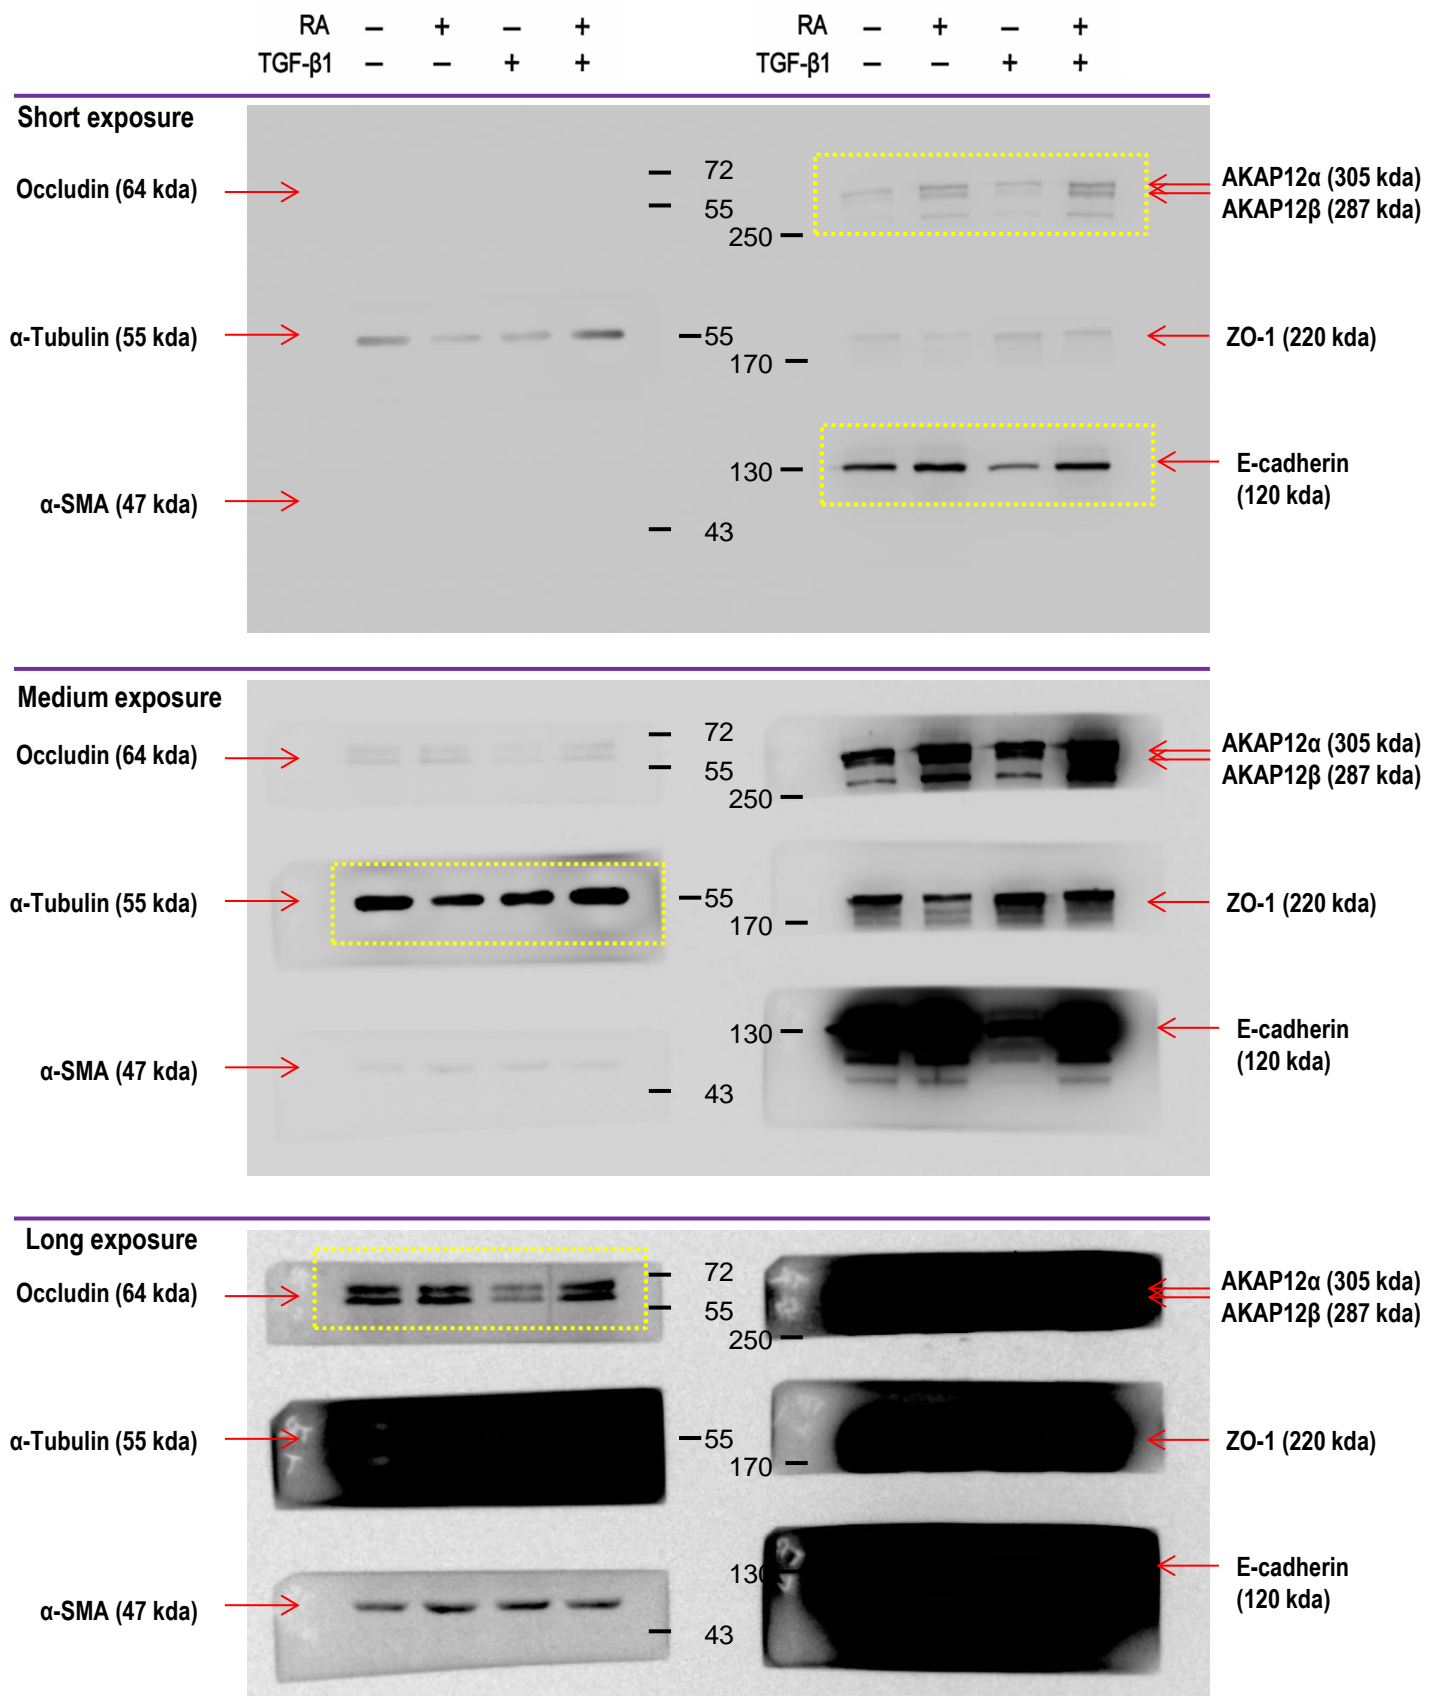

### Supplementary Fig. 3b

Bands of yellow boxes were used as representative data

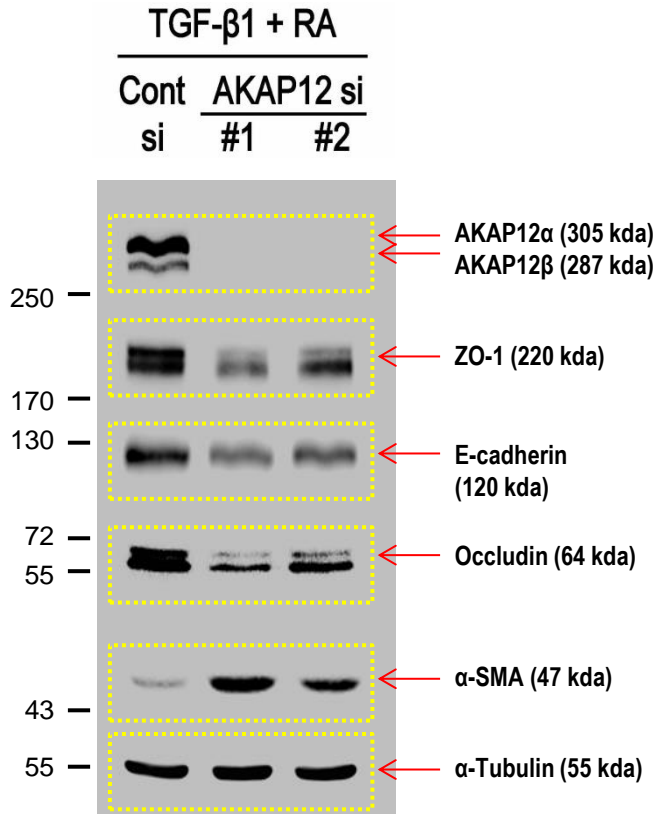

### Supplementary Fig. 3d

Bands of yellow boxes were used as representative data

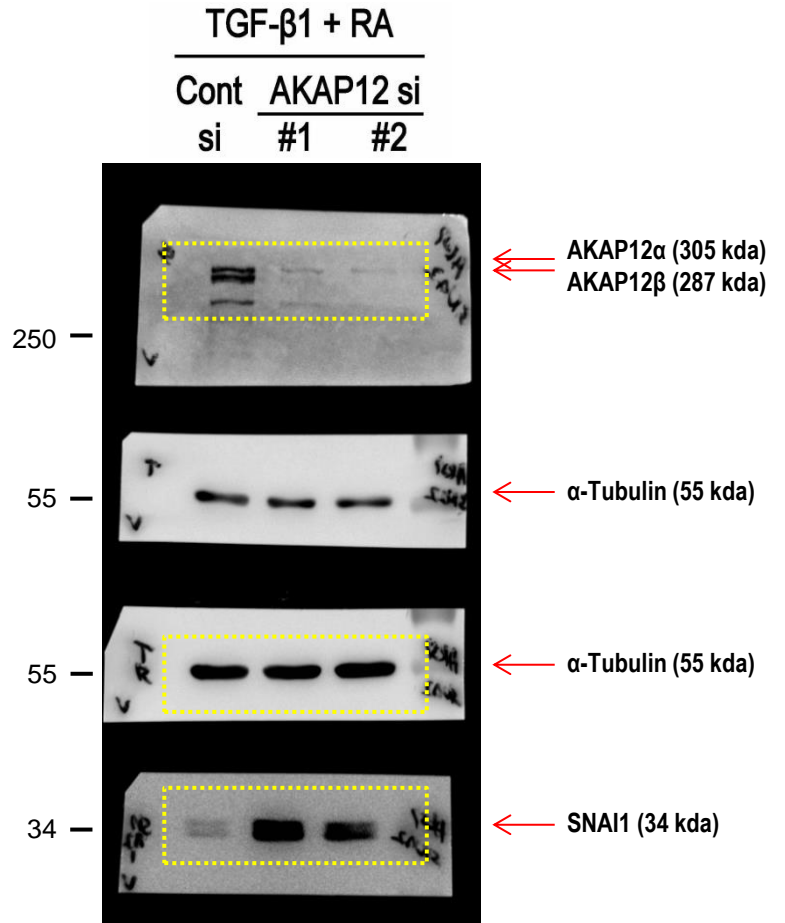

Supplementary Figure 6. Continued

# Supplementary Fig. 4

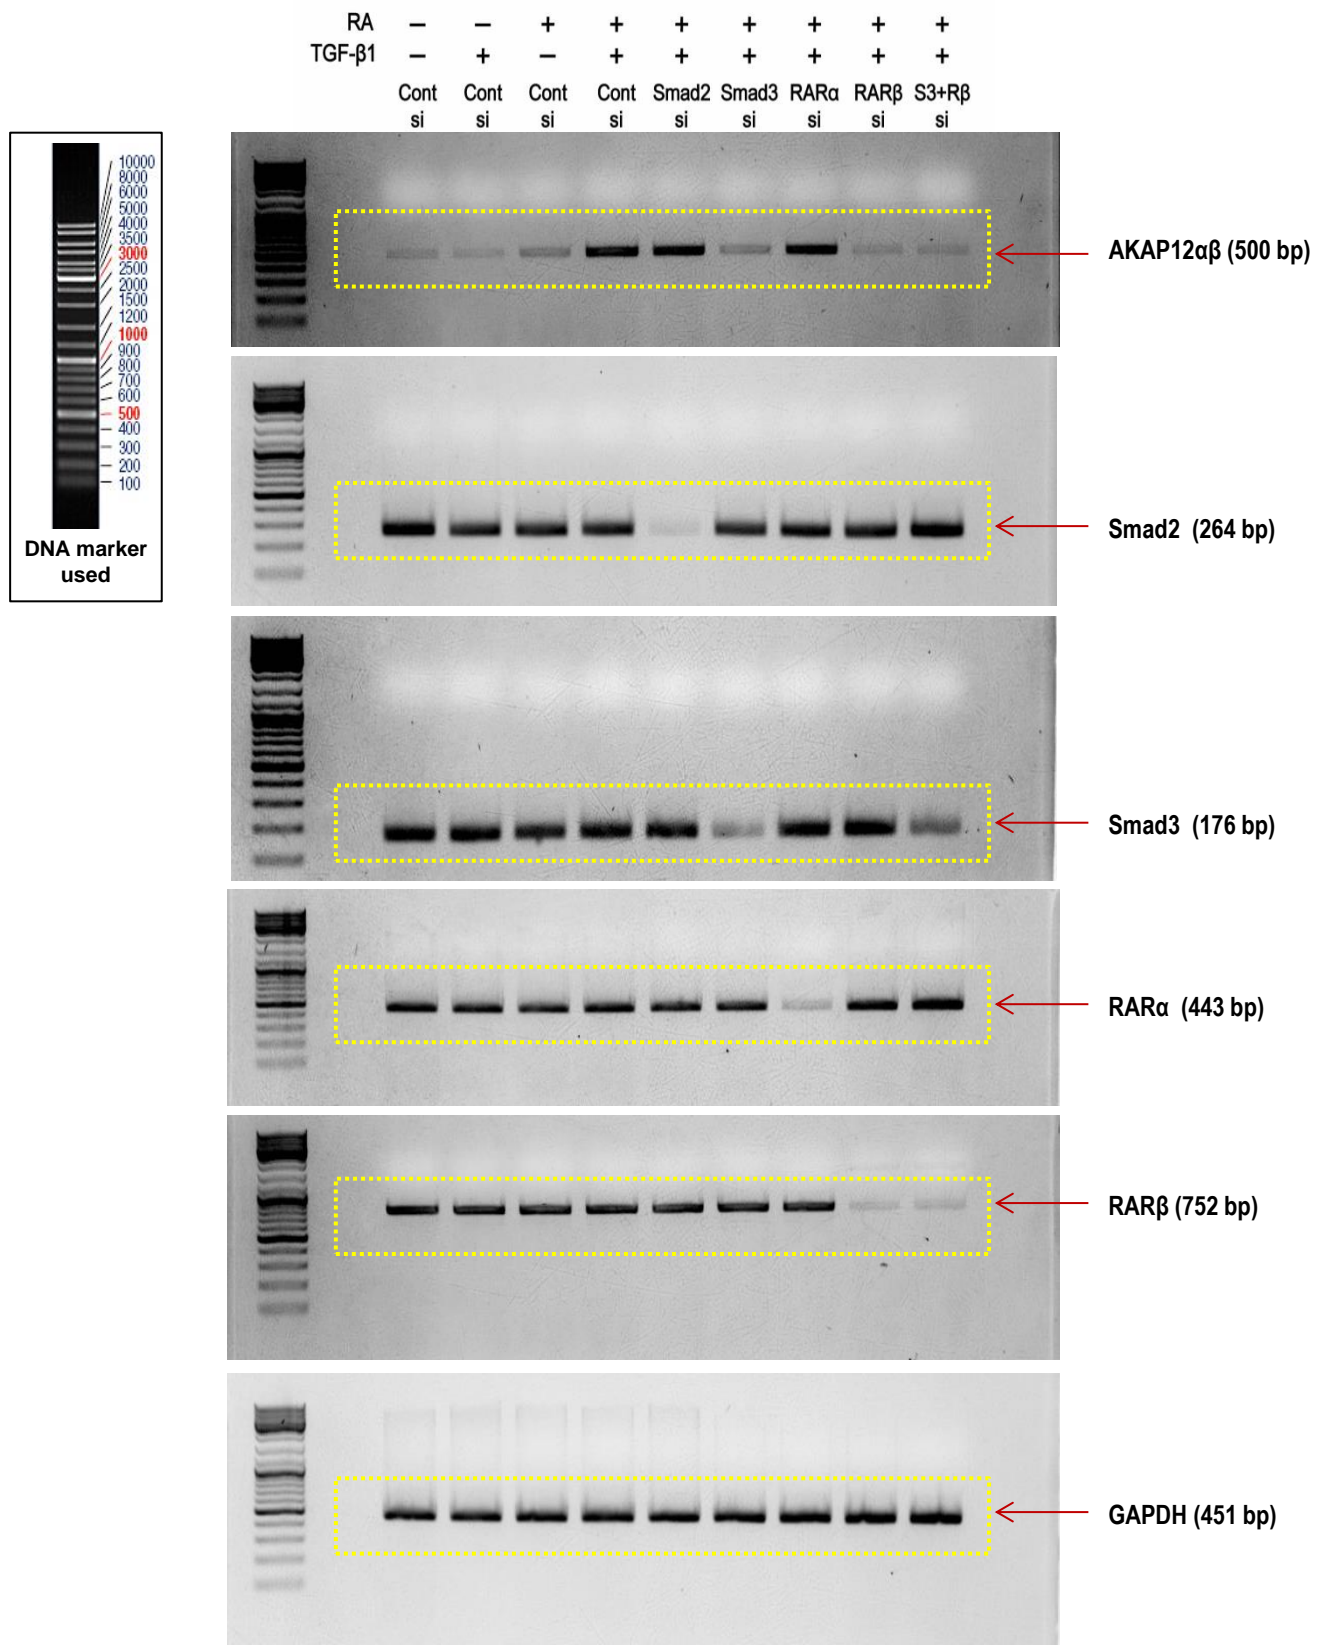

Supplementary Figure 6. Continued



**Supplementary table 1. Sequences for siRNAs and PCR primers**

| <b>siRNA sequence</b>                                                                      |                                                                                       |                      |
|--------------------------------------------------------------------------------------------|---------------------------------------------------------------------------------------|----------------------|
| <b>GFP</b>                                                                                 | 5'-GUU CAG CGU GUC CGG CGA G dT-3'                                                    |                      |
| <b>AKAP12 #1</b>                                                                           | 5'-UCU GCA GAA UCU CCG ACU A dT-3'                                                    |                      |
| <b>AKAP12 #2</b>                                                                           | 5'-AGA CGG AUG UAG UGU UGAA dT-3'                                                     |                      |
| <b>SNAI1</b>                                                                               | 5'-GGU GUG ACU AAC UAU GCA A dT-3'                                                    |                      |
| <b>Smad2</b>                                                                               | 5'-UCU UUG UGC AGA GCC CCA A dTdT-3'                                                  |                      |
| <b>Smad3</b>                                                                               | 5'-ACC UAU CCC CGA AUC CGA U dTdT-3'                                                  |                      |
| <b>RAR<math>\alpha</math></b>                                                              | 5'-GAA CAU GGU GUA CAC GUG U dTdT-3'                                                  |                      |
| <b>RAR<math>\beta</math></b>                                                               | 5'-UUA AGC AGA UGG CAC UGA GAA GGC C dTdT-3'                                          |                      |
| <b>PCR primer</b>                                                                          |                                                                                       |                      |
| <b>AKAP12<math>\alpha</math></b>                                                           | F5'-GTC TCC TTC ATT CGC AGG CT-3'<br>R5'-CAT GGC TCC TCC GCA CTT CTC-3'               | Tm: 55 °C, Cycle: 30 |
| <b>AKAP12<math>\beta</math></b>                                                            | F5'-AGG GCA CCT CCG GTT CTC-3'<br>R5'-GGT TCG CTT TCT TTG GAT GC-3'                   | Tm: 55 °C, Cycle: 26 |
| <b>AKAP12<math>\alpha\beta</math><br/>(<math>\alpha</math>, <math>\beta</math> common)</b> | F5'-AAG TCA GCG GTT GTT CAC GAC-3'<br>R5'-CTG TTT CAC TGG TCA CGG GAC-3'              | Tm: 55 °C, Cycle: 24 |
| <b>SNAI1</b>                                                                               | F5'-TTT ACC TTC CAG CAG CCC TA-3'<br>R5'-TTT CCC ACT GTC CTC ATC TG-3'                | Tm: 60 °C, Cycle: 35 |
| <b>SNAI2</b>                                                                               | F5'-GCC TCC AAA AAG CCA AAC TAC AG-3'<br>R5'-GTG TGC TAC ACA GCA GCC-3'               | Tm: 60 °C, Cycle: 32 |
| <b>Twist1</b>                                                                              | F5'- GGA GTC CGC AGT CTT ACG AG-3'<br>R5'-TCT GGA GGA CCT GGT AGA GG-3'               | Tm: 57 °C, Cycle: 35 |
| <b>Twist2</b>                                                                              | F5'-GCC GCC AGG TAC ATA GAC TT-3'<br>R5'-CCC CAA ACA TAA GAC CCA GA-3'                | Tm: 57 °C, Cycle: 35 |
| <b>ZEB1</b>                                                                                | F5'-CGA GTC AGA TGC AGA AAA TGA GCA AAA C-3'<br>R5'-ACC CAG ACT GCG TCA CAT GTC TT-3' | Tm: 55 °C, Cycle: 31 |
| <b>ZEB2</b>                                                                                | F5'-TGC TCG CAC TAC AAT GCA TC-3'<br>R5'-ACA GGG TGA GCT TAA CAC TG-3'                | Tm: 55 °C, Cycle: 31 |
| <b>Smad2</b>                                                                               | F5'-AGA TCA GTG GGA TAC AAC AGG-3'<br>R5'-GGC ACT AAT ACT GGA GGC AA-3'               | Tm: 62 °C, Cycle: 28 |
| <b>Smad3</b>                                                                               | F5'-TGC TGG TGA CTG GAT AGC AG-3'<br>R5'-CTC CTT GGA AGG TGC TGA AG-3'                | Tm: 60°C, Cycle: 27  |
| <b>RAR<math>\alpha</math></b>                                                              | F5'-AGC ATC CAG AAG AAC ATG GTG-3'<br>R5'-CTT GAG GAG GGT GAT CTG GTC-3'              | Tm: 60°C, Cycle: 28  |
| <b>RAR<math>\beta</math></b>                                                               | F5'-AGG AGA CTT CGA AGC AAG-3'<br>R5'-GTC AAG GGT TCA TGT CCT TC-3'                   | Tm: 58°C, Cycle: 26  |
| <b>GAPDH</b>                                                                               | F5'-ACC ACA GTC CAT GCC ATC AC-3'<br>R5'-TCC ACC ACC CTG TTG CTG TA-3'                | Tm: 55°C, Cycle: 22  |
